1  
2  
3  
4  
5  
6  
7  
8  
9  
10  
11  
12  
13  
14  
15  
16  
17  
18  
19  
20  
21  
22  
23

### **Gut microbial taxa elevated by dietary sugar disrupt memory function**

Emily E Noble<sup>1</sup>, Christine A. Olson<sup>3</sup>, Elizabeth Davis<sup>2</sup>, Linda Tsan<sup>2</sup>, Yen-Wei Chen<sup>3</sup>,  
Ruth Schade<sup>1</sup>, Clarissa Liu<sup>2</sup>, Andrea Suarez<sup>2</sup>, Roshonda B Jones<sup>2</sup>, Claire de La Serre<sup>1</sup>,  
Xia Yang<sup>3</sup>, \*Elaine Y. Hsiao<sup>3</sup> and \*Scott E Kanoski<sup>2</sup>

<sup>1</sup>University of Georgia, Athens, Georgia, USA; <sup>2</sup>University of Southern California, Los Angeles, California, USA; <sup>3</sup>University of California, Los Angeles, California, USA

\*Correspondence (Lead Contact):

Scott E. Kanoski, Ph.D

University of Southern California

Email: [kanoski@usc.edu](mailto:kanoski@usc.edu)

Or

\*Elaine Y. Hsiao, Ph.D (Co-Corresponding Author)

University of California Los Angeles

Email: [ehsiao@ucla.edu](mailto:ehsiao@ucla.edu)

24 **Abstract:**

25 Emerging evidence highlights a critical relationship between gut microbiota and  
26 neurocognitive development. Excessive consumption of sugar and other unhealthy  
27 dietary factors during early life developmental periods yields changes in the gut  
28 microbiome as well as neurocognitive impairments. However, it is unclear whether  
29 these two outcomes are functionally connected. Here we explore whether excessive early  
30 life consumption of added sugars negatively impacts memory function via the gut  
31 microbiome. Rats were given free access to a sugar-sweetened beverage (SSB) during  
32 the adolescent stage of development. Memory function and anxiety-like behavior were  
33 assessed during adulthood and gut bacterial and brain transcriptome analyses were  
34 conducted. Taxa-specific microbial enrichment experiments examined the functional  
35 relationship between sugar-induced microbiome changes and neurocognitive and brain  
36 transcriptome outcomes. Chronic early life sugar consumption impaired adult  
37 hippocampal-dependent memory function without affecting body weight or anxiety-like  
38 behavior. Adolescent SSB consumption during adolescence also altered the gut  
39 microbiome, including elevated abundance of two species in the genus *Parabacteroides*  
40 (*P. distasonis* and *P. johnsonii*) that were negatively correlated with hippocampal  
41 function. Transferred enrichment of these specific bacterial taxa in adolescent rats  
42 impaired hippocampal-dependent memory during adulthood. Hippocampus  
43 transcriptome analyses revealed that early life sugar consumption altered gene  
44 expression in intracellular kinase and synaptic neurotransmitter signaling pathways,  
45 whereas *Parabacteroides* microbial enrichment altered gene expression in pathways  
46 associated with metabolic function, neurodegenerative disease, and dopaminergic  
47 signaling. Collectively these results identify a role for microbiota “dysbiosis” in

48 mediating the detrimental effects of early life unhealthy dietary factors on hippocampal-  
49 dependent memory function.

50

51

52

53 **Introduction:**

54

55       The gut microbiome has recently been implicated in modulating neurocognitive  
56 development and consequent functioning<sup>1-4</sup>. Early life developmental periods represent  
57 critical windows for the impact of indigenous gut microbes on the brain, as evidenced by  
58 the reversal of behavioral and neurochemical abnormalities in germ free rodents when  
59 inoculated with conventional microbiota during early life, but not during adulthood<sup>5-7</sup>.  
60 Dietary factors are a critical determinant of gut microbiota diversity and can alter gut  
61 bacterial communities, as evident from the microbial plasticity observed in response to  
62 pre- and probiotic treatment, as well as the “dysbiosis” resulting from consuming  
63 unhealthy, yet palatable foods that are associated with obesity and metabolic disorders  
64 (e.g., Western diet; foods high in saturated fatty acids and added sugar)<sup>8</sup>. In addition to  
65 altering the gut microbiota, consumption of Western dietary factors yields long-lasting  
66 memory impairments, and these effects are more pronounced when consumed during  
67 early life developmental periods vs. during adulthood<sup>9-11</sup>. Whether diet-induced changes  
68 in specific bacterial populations are functionally related to altered early life  
69 neurocognitive outcomes, however, is poorly understood.

70

71 The hippocampus, which is well known for its role in spatial and episodic memory and  
72 more recently for regulating learned and social aspects of food intake control<sup>12-17</sup>, is  
73 particularly vulnerable to the deleterious effects of Western dietary factors<sup>18-20</sup>. During  
74 the juvenile and adolescent stages of development, a time when the brain is rapidly  
75 developing, consumption of diets high in saturated fat and sugar<sup>21-23</sup> or sugar alone<sup>24-27</sup>  
76 impairs hippocampal function while in some cases preserving memory processes that do

77 not rely on the hippocampus. While several putative underlying mechanisms have been  
78 investigated, the precise biological pathways linking dietary factors to neurocognitive  
79 dysfunction remain largely undetermined<sup>11</sup>. Here we aimed to determine whether  
80 sugar-induced alterations in gut microbiota during early life are causally related to  
81 hippocampal-dependent memory impairments observed during adulthood.

82

### 83 **Methods and Materials:**

84

#### 85 **Experimental Subjects**

86 Juvenile male Sprague Dawley rats (Envigo; arrival post natal day (PN) 26-28; 50-70g)  
87 were housed individually in standard conditions with a 12:12 light/dark cycle. All rats  
88 had ad libitum access to water and Lab Diet 5001 (PMI Nutrition International,  
89 Brentwood, MO; 29.8 % kcal from protein, 13.4% kcal from fat, 56.7% kcal from  
90 carbohydrate), with modifications where noted. All experiments were performed in  
91 accordance with the approval of the Animal Care and Use Committee at the University  
92 of Southern California.

93

#### 94 **Experiment 1**

95 Twenty one juvenile male rats (PN 26-28) were divided into two groups with equal body  
96 weight and given ad libitum access to: 1) 11% weight-by-volume (w/v) solution  
97 containing monosaccharide ratio of 65% fructose and 35% glucose in reverse osmosis-  
98 filtered water (SUG;  $n=11$ ) or 2) or an extra bottle of reverse osmosis-filtered water  
99 (CTL;  $n=10$ ). This solution was chosen to model commonly consumed sugar-sweetened  
100 beverages in humans in terms of both caloric content and monosaccharide ratio<sup>28</sup>.

101 Additionally, all rats were given ad libitum access to water and standard rat chow. Food  
102 intake, solution intake and body weights were monitored thrice weekly except where  
103 prohibited due to behavioral testing. At PN 60, rats underwent Novel Object in Context  
104 (NOIC) testing, to measure hippocampal-dependent episodic contextual memory. At PN  
105 67 rats underwent anxiety-like behavior testing in the Zero Maze, followed by body  
106 composition testing at PN 70 and an intraperitoneal glucose tolerance test (IP GTT) at  
107 PN 84. All behavioral procedures were run at the same time each day (4-6 hours into the  
108 light cycle). Fecal and cecal samples were collected prior to sacrifice at PN 104.

109

110 In a separate cohort of juvenile male rats (n=6/group) animals were treated as above,  
111 but on PN day 60 rats were tested in the Novel Object Recognition (NOR) and Open  
112 Field (OF) tasks, with two days in between tasks. Animals were sacrificed and tissue  
113 punches were collected from the dorsal hippocampus on PN day 65. Tissue punches  
114 were flash frozen in a beaker filled with isopentane and surrounded dry ice and then  
115 stored at -80°C until further analyses.

116

## 117 **Experiment 2**

118 Twenty-three juvenile male rats (PN 26-28) were divided into two groups and received a  
119 gavage twice daily (12 hours apart) for 7 days (only one treatment was given on day 7) of  
120 either (1) saline (SAL; n=8), or (2) a cocktail of antibiotics consisting of Vancomycin (50  
121 mg/kg), Neomycin (100 mg/kg), and Metronidazole (100 mg/kg) along with  
122 supplementation with 1 mg/mL of ampicillin in their drinking water (ABX; n=15), which  
123 is a protocol modified from <sup>29</sup>. Animals were housed in fresh, sterile cages on Day 3 of  
124 the antibiotic or saline treatment, and again switched to fresh sterile cages on Day 7

125 after the final gavage. All animals were maintained on sterile, autoclaved water and  
126 chow for the remainder of the experiment. Rats in the ABX group were given water  
127 instead of ampicillin solution on Day 7. Animals in the ABX group were further  
128 subdivided to receive either gavage of a 1:1 ratio of *Parabacteroides distasonis* and  
129 *Parabacteroides johnsonii* (PARA; n=8) or saline (SAL; n=7) thirty six hours after the  
130 last ABX treatment. To minimize potential contamination, rats were handled minimally  
131 for 14 days. Cage changes occurred once weekly at which time animals and food were  
132 weighed. Experimenters wore fresh, sterile PPE and weigh boxes were cleaned with  
133 sterilizing solution in between each cage change. On PN 50 rats were tested in NOIC, on  
134 PN 60 rats were tested in NOR, on PN 62 rats were tested in the Zero Maze, followed by  
135 Open Field on PN 64. On PN 73 rats were given an IP GTT, and on PN 76 body  
136 composition was tested. Rats were sacrificed at PN 83 and dorsal hippocampus tissue  
137 punches and cecal samples were collected. Tissue punches were flash frozen in a beaker  
138 filled with isopentane and surrounded dry ice and cecal samples were placed in  
139 microcentrifuge tubes embedded in dry ice. Samples were subsequently stored at -80°C  
140 until further analyses.

141

#### 142 **IP glucose tolerance test (IP GTT)**

143 Animals were food restricted 24 hours prior to IP GTT. Immediately prior to the test,  
144 baseline blood glucose readings were obtained from tail tip and recorded by a blood  
145 glucose meter (One touch Ultra2, LifeScan Inc., Milpitas, CA). Each animal was then  
146 intraperitoneally (IP) injected with dextrose solution (0.923g/ml by body weight) and  
147 tail tip blood glucose readings were obtained at 30, 60, 90, and 120 min after IP  
148 injections, as previously described <sup>24</sup>.

149

## 150 **Zero Maze**

151 The Zero Maze is an elevated circular track (63.5 cm fall height, 116.8cm outside  
152 diameter), divided into four equal length sections. Two sections were open with 3 cm  
153 high curbs, whereas the 2 other closed sections contained 17.5 cm high walls. Animals  
154 are placed in the maze facing the open section of the track in a room with ambient  
155 lighting for 5 min while the experimenter watches the animal from a monitor outside of  
156 the room. The experimenter records the total time spent in the open sections (defined as  
157 the head and front two paws in open arms), and the number of crosses into the open  
158 sections from the closed sections.

159

## 160 **Novel object in context task (NOIC)**

161 NOIC measures episodic contextual memory based on the capacity for an animal to  
162 identify which of two familiar objects it has never seen before in a specific context.  
163 Procedures were adapted from prior reports<sup>30,31</sup>. Briefly, rats are habituated to two  
164 distinct contexts on subsequent days (with the habituation order counterbalanced by  
165 group) for 5-min sessions: Context 1 is a semi-transparent box (15in W x 24in L x 12in  
166 H) with orange stripes and Context 2 is a grey opaque box (17in W x 17in L x 16in H)  
167 (Context identify assignments counterbalanced by group), each context is in a separate  
168 dimly lit room, which is obtained using two desk lamps pointed toward the floor. Day 1  
169 of NOIC begins with each animal being placed in Context 1 containing two distinct  
170 similarly sized objects placed in opposite corners: a 500ml jar filled with blue water  
171 (Object A) and a square glass container (Object B) (Object assignments and placement  
172 counterbalanced by group). On day 2 of NOIC, animals are placed in Context 2 with



173 duplicates of one of the objects. On NOIC day 3, rats are placed in Context 2 with  
174 Objects A and Object B. One of these objects is not novel to the rat, but its placement in  
175 Context 2 is novel. All sessions are 5 minutes long and are video recorded. Each time the  
176 rat is placed in one of the contexts, it is placed with its head facing away from both  
177 objects. The time spent investigating each object is recorded from the video recordings  
178 by an experimenter who is blinded to the treatment groups. Exploration is defined as  
179 sniffing or touching the object with the nose or forepaws. The task is scored by  
180 calculating the time spent exploring the Novel Object to the context divided by the time  
181 spent exploring both Objects A and B combined, which is the novelty or “discrimination  
182 index”. Rats with an intact hippocampus will preferentially investigate the object that is  
183 novel to Context 2, given that this object is a familiar object yet is now presented in a  
184 novel context, whereas hippocampal inactivation impairs the preferential investigation  
185 of the object novel to Context 2 <sup>30</sup>.

186

### 187 **Novel Object Recognition**

188 The apparatus used for NOR is a grey opaque box (17in W x 17in L x 16in H) placed in a  
189 dimly lit room, which is obtained using two desk lamps pointed toward the floor.

190 Procedures are adapted from <sup>32</sup>. Rats are habituated to the empty arena and conditions  
191 for 10 minutes on the day prior to testing. The novel object and the side on which the  
192 novel object is placed is counterbalanced by group. The test begins with a 5-minute  
193 familiarization phase, where rats are placed in the center of the arena, facing away from  
194 the objects, with two identical copies of the same object to explore. The objects were  
195 either two identical cans or two identical bottles, counterbalanced by treatment group.  
196 The objects were chosen based on preliminary studies which determined that they are

197 equally preferred by Sprague Dawley rats. Animals are then removed from the arena and  
198 placed in the home cage for 5 minutes. The arena and objects are cleaned with 10%  
199 ethanol solution, and one of the objects in the arena is replaced with a different one  
200 (either the can or bottle, whichever the animal has not previously seen, i.e., the “novel  
201 object”). Animals are again placed in the center of the arena and allowed to explore for 3  
202 minutes. Time spent exploring the objects is recorded via video recording and analyzed  
203 using Any-maze activity tracking software (Stoelting Co., Wood Dale, IL).

204

### 205 **Open Field**

206 Open field measures general activity level and also anxiety-like behavior in the rat. A  
207 large gray bin, 60 cm (L) X 56 CM (W) is placed under diffuse even lighting (30 lux). A  
208 center zone is identified and marked in the bin (19 cm L X 17.5 cm W). A video camera is  
209 placed directly overhead and animals are tracked using AnyMaze Software (Stoelting  
210 Co., Wood Dale, IL). Animals are placed in the center of the box facing the back wall and  
211 allowed to explore the arena for 10 min while the experimenter watches from a monitor  
212 in an adjacent room. The apparatus is cleaned with 10% ethanol after each rat is tested.

213

### 214 **Body Composition**

215 Body composition (body fat, lean mass) was measured using LF90 time domain nuclear  
216 magnetic resonance (Bruker NMR minispec LF 90II, Bruker Daltonics, Inc.).

217

### 218 **Bacterial transfer**

219 *Parabacteroides distasonis* (ATCC 8503) was cultured under anaerobic conditions at  
220 37C in Reinforced Clostridial Medium (RCM, BD Biosciences). *Parabacteroides*

221 *johnsonii* (DSM 18315) was grown in anaerobic conditions in PYG medium (modified,  
222 DSM medium 104). Cultures were authenticated by full-length 16S rRNA gene  
223 sequencing. For bacterial enrichment,  $10^9$  colony-forming units of both *P. distasonis*  
224 and *P. johnsonii* were suspended in 500  $\mu$ L pre-reduced PBS and orally gavaged into  
225 antibiotic-treated rats. When co-administered, a ratio of 1:1 was used for *P. distasonis*  
226 and *P. johnsonii*.

227

### 228 **Gut microbiota DNA extraction and 16s rRNA gene sequencing in sugar-fed** 229 **and control rats**

230 All samples were extracted and sequenced according to the guidelines and procedures  
231 established by the Earth Microbiome Project <sup>33</sup>. DNA was extracted from fecal and cecal  
232 samples using the MO BIO PowerSoil DNA extraction kit. PCR targeting the V4 region  
233 of the 16S rRNA bacterial gene was performed with the 515F/806R primers, utilizing the  
234 protocol described in Caporaso et al.<sup>34</sup>. Amplicons were barcoded and pooled in equal  
235 concentrations for sequencing. The amplicon pool was purified with the MO BIO  
236 UltraClean PCR Clean-up kit and sequenced by the 2 x 150bp MiSeq platform at the  
237 Institute for Genomic Medicine at UCSD. All sequences were deposited in Qiita Study  
238 11255 as raw FASTQ files. Sequences were demultiplexed using Qiime-1 based “split  
239 libraries” with the forward reads only dropping. Demultiplexed sequences were then  
240 trimmed evenly to 100 bp and 150 bp to enable comparison to other studies for meta-  
241 analyses. Trimmed sequences were matched to known OTUs at 97% identity.

242

### 243 **Gut microbiota DNA extraction and 16S rRNA gene sequencing for** 244 ***Parabacteroides*-enriched and control rats**

245 Total bacterial genomic DNA was extracted from rat fecal samples (0.25 g) using the  
246 Qiagen DNeasy PowerSoil Kit. The library was prepared following methods from  
247 (Caporaso et al., 2011). The V4 region (515F-806R) of the 16S rDNA gene was PCR  
248 amplified using individually barcoded universal primers and 30 ng of the extracted  
249 genomic DNA. The conditions for PCR were as follows: 94°C for 3 min to denature the  
250 DNA, with 35 cycles at 94°C for 45 s, 50°C for 60 s, and 72°C for 90 s, with a final  
251 extension of 10 min at 72°C. The PCR reaction was set up in triplicate, and the PCR  
252 products were purified using the Qiaquick PCR purification kit (QIAGEN). The purified  
253 PCR product was pooled in equal molar concentrations quantified by nanodrop and  
254 sequenced by Laragen, Inc. using the Illumina MiSeq platform and 2 x 250bp reagent  
255 kit for paired-end sequencing. Amplicon sequence variants (ASVs) were chosen after  
256 denoising with the Deblur pipeline. Taxonomy assignment and rarefaction were  
257 performed using QIIME2-2019.10.

258

### 259 **Hippocampal RNA extraction and sequencing**

260 Hippocampi from rats treated with or without sugar or *Parabacteroides* were subject to  
261 RNA-seq analysis. Total RNA was extracted according to manufacturer's instructions  
262 using RNeasy Lipid Tissue Mini Kit (Qiagen, Hilden, Germany). Total RNA was checked  
263 for degradation in a Bioanalyzer 2100 (Agilent, Santa Clara, CA, USA). Quality was very  
264 high for all samples, and libraries were prepared from 1 ug of total RNA using a NuGen  
265 Universal Plus mRNA-seq Library Prep Kit (Tecan Genomics Inc. Redwood City, CA).  
266 Final library products were quantified using the Qubit 2.0 Fluorometer (Thermo Fisher  
267 Scientific Inc., Waltham, MA, USA), and the fragment size distribution was determined  
268 with the Bioanalyzer 2100. The libraries were then pooled equimolarly, and the final

269 pool was quantified via qPCR using the Kapa Biosystems Library Quantification Kit,  
270 according to manufacturer's instructions. The pool was sequenced in an Illumina  
271 NextSeq 550 platform (Illumina, San Diego, CA, USA), in Single-Read 75 cycles format,  
272 obtaining about 25 million reads per sample. The preparation of the libraries and the  
273 sequencing was performed at the USC Genome Core (<http://uscgenomecore.usc.edu/>)

274

### 275 **RNA-seq quality control**

276 Data quality checks were performed using the FastQC tool  
277 (<http://www.bioinformatics.babraham.ac.uk/projects/fastqc>) and low quality reads  
278 were trimmed with Trim\_Galore  
279 ([http://www.bioinformatics.babraham.ac.uk/projects/trim\\_galore/](http://www.bioinformatics.babraham.ac.uk/projects/trim_galore/)). RNA-seq reads  
280 passing quality control were mapped to *Rattus norvegicus* transcriptome (Rnor6) and  
281 quantified with Salmon<sup>35</sup>. Salmon directly mapped RNA-seq reads to Rat  
282 transcriptome and quantified transcript counts. Txiimport<sup>36</sup> were used to convert  
283 transcript counts into gene counts. Potential sample outliers were detected by principle  
284 component analysis (PCA) and one control and one treatment sample from the  
285 *Parabacteroides* experiment were deemed outliers (Figure S7A, B) and removed.

286

### 287 **Identification of differentially expressed genes (DEGs)**

288 DESeq2<sup>37</sup> were used to conduct differential gene expression analysis between sugar  
289 treatment and the corresponding controls, or between *Parabacteroides* treatment and  
290 the corresponding controls. Low-abundance genes were filtered out and only those  
291 having a mean raw count > 1 in more than 50% of the samples were included.  
292 Differentially expressed genes were detected by DESeq2 with default settings.

293 Significant DEGs were defined as Benjamini-Hochberg (BH) adjusted false discovery  
294 rate (FDR) < 0.05. For heatmap visualization, genes were normalized with variance  
295 stabilization transformation implemented in DESeq2, followed by calculating a z-score  
296 for each gene.

297

### 298 **Pathway analyses of DEGs**

299 For the pathway analyses, DEGs at an unadjusted p-value < 0.01 were used. Pathway  
300 enrichment analysis were conducted using enrichr<sup>38</sup> by intersecting each signature with  
301 pathways or gene sets from KEGG<sup>39</sup>, gene ontology biological pathways (GOBP),  
302 Cellular Component (GOCP), Molecular Function (GOMF)<sup>40</sup> and Wikipathways<sup>41</sup>.  
303 Pathways at FDR < 0.05 were considered significant. Unless otherwise specified, R 3.5.2  
304 was used for the analysis mentioned in the RNA sequencing section.

305

### 306 **Additional statistical methods**

307 Data are presented as means ± SEM. For analytic comparisons of body weight, total food  
308 intake, and chow intake, groups were compared using repeated measures ANOVA in  
309 Prism software (GraphPad Inc., version 8.0). Taxonomic comparisons from 16S rRNA  
310 sequencing analysis were analyzed by analysis of composition of microbiomes  
311 (ANCOM). When significant differences were detected, Sidak post-hoc test for multiple  
312 comparisons was used. Area under the curve (AUC) for the IP GTT testing was also  
313 calculated using Prism. All other statistical analyses were performed using Student's  
314 two-tailed unpaired t tests in excel software (Microsoft Inc., version 15.26). Normality  
315 was confirmed prior to the utilization of parametric testing. For all analyses, statistical  
316 significance was set at  $P < 0.05$ .

317

318 **Results:**

319

320 **Early-life sugar consumption impairs hippocampal-dependent memory**  
321 **function**

322 Results from the Novel Object in Context (NOIC) task, which measures hippocampal-  
323 dependent episodic contextual memory function<sup>31</sup>, reveal that while there were no  
324 differences in total exploration time of the combined objects on days 1 or 3 of the task  
325 (Figure 1A, B), animals fed sugar solutions in early life beginning at PN 28 had a  
326 reduced capacity to discriminate an object that was novel to a specific context when  
327 animals were tested during adulthood (PN 60), indicating impaired hippocampal  
328 function (Figure 1C). Conversely, animals fed sugar solutions in early life performed  
329 similarly to those in the control group when tested in the novel object recognition task  
330 (NOR) (Figure 1D), which tests object recognition memory independent of context.  
331 Notably, when performed using the current methods with a short duration between the  
332 familiarization phase and the test phase, NOR not hippocampal-dependent but instead  
333 is primarily dependent on the perirhinal cortex<sup>31,42-44</sup>. These data suggest that early life  
334 dietary sugar consumption impairs performance in hippocampal-dependent contextual-  
335 based recognition memory without affecting performance in perirhinal cortex-  
336 dependent recognition memory independent of context<sup>24</sup>.

337

338 Elevated anxiety-like behavior and altered general activity levels may influence novelty  
339 exploration independent of memory effects and may therefore confound the  
340 interpretation of behavioral results. Thus, we next tested whether early life sugar

341 consumption affects anxiety-like behavior using two different tasks designed to measure  
342 anxiety-like behavior in the rat: the elevated zero maze and the open field task, that  
343 latter of which also assesses levels of general activity<sup>45</sup>. Early life sugar consumption  
344 had no effect on time spent in the open area or in the number of open area entries in the  
345 zero maze (Figure 1E, F). Similarly, early life sugar had no effect on distance travelled or  
346 time spent in the center zone in the open field task (Figure 1G, H). Together these data  
347 suggest that habitual early life sugar consumption did not increase anxiety-like behavior  
348 or general activity levels in the rats.

349

### 350 **Early life sugar consumption impairs glucose tolerance without affecting** 351 **total caloric intake, body weight, or adiposity**

352 Given that excessive sugar consumption is associated with weight gain and metabolic  
353 deficits<sup>46</sup>, we tested whether access to a sugar solution during the adolescent phase of  
354 development would affect food intake, body weight gain, adiposity, and glucose  
355 tolerance in the rat. Early life sugar consumption had no effect on body composition  
356 during adulthood (Figure 1I, Figure S1 A, B). Early life sugar consumption also had no  
357 effect on body weight or total kcal intake (Figure 1J, K), which is in agreement with  
358 previous findings<sup>24,27,47</sup>. Animals steadily increased their intake of the 11% sugar  
359 solution throughout the study (Figure 1L) but compensated for the calories consumed in  
360 the sugar solutions by reducing their intake of dietary chow (Figure S1 C). However,  
361 animals that were fed sugar solutions during adolescence showed impaired peripheral  
362 glucose metabolism in an intraperitoneal glucose tolerance test (IP GTT) (Figure S1D).

363

### 364 **Gut microbiota are impacted by early life sugar consumption**



365 Principal component analyses of 16s rRNA gene sequencing data of fecal samples  
366 revealed a separation between the fecal microbiota of rats fed early life sugar and  
367 controls (Figure 2A). Results from LEfSe analysis identified differentially abundant  
368 bacterial taxa in fecal samples that were elevated by sugar consumption. These include  
369 the family *Clostridiaceae* and the genus *o2do6* within *Clostridiaceae*, the family  
370 *Mogibacteriaceae*, the family *Enterobacteriaceae*, the order *Enterobacteriales*, the  
371 class of *Gammaproteobacteria*, and the genus *Parabacteroides* within the family  
372 *Porphyromonadaceae* (Figure 2B,C). In addition to an elevated % relative abundance of  
373 the genus *Parabacteroides* in animals fed early life sugar (Figure 2D), log transformed  
374 counts of the *Parabacteroides* negatively correlated with performance scores in the  
375 NOIC memory task (Figure 2E). Of the additional bacterial populations significantly  
376 affected by sugar treatment, regression analyses did not identify any other genera as  
377 being significantly correlated to NOIC memory performance. Within *Parabacteroides*,  
378 levels of two operational taxonomic units (OTUs) that were elevated by sugar negatively  
379 correlated with performance in the NOIC task, identified as taxonomically related to *P.*  
380 *johnsonii* and *P. distasonis* (Figure 2F, G). The significant negative correlation between  
381 NOIC performance and *Parabacteroides* was also present within each of the diet groups  
382 alone, but when separated out by diet group only *P. distasonis* showed a significant  
383 negative correlation for each diet group ( $P < .05$ ), whereas *P. johnsonii* showed a non-  
384 significant trend in both the control and sugar groups ( $P = .06$ , and  $P = .08$ , respectively;  
385 Figure S2A-C). Abundance of other bacterial populations that were affected by sugar  
386 consumption were not significantly related to memory task performance.

387 There was a similar separation between groups in bacteria analyzed from cecal  
388 samples (Figure S3A). LEfSe results from cecal samples show elevated *Bacilli*,

389 *Actinobacteria*, *Erysipelotrichia*, and *Gammaproteobacteria* in rats fed early life sugar,  
390 and elevated *Clostridia* in the controls (Figure S3B-C). Abundances at the different  
391 taxonomic levels in fecal and cecal samples are shown in (Figure S4, S5). Regression  
392 analyses did not identify these altered cecal bacterial populations as being significantly  
393 correlated to NOIC memory performance.

394

### 395 **Early life *Parabacteroides* enrichment impairs memory function**

396 To determine whether neurocognitive outcomes due to early life sugar consumption  
397 could be attributable to elevated levels of *Parabacteroides* in the gut, we experimentally  
398 enriched the gut microbiota of naïve juvenile rats with two *Parabacteroides* species that  
399 exhibited high 16S rRNA sequencing alignment with OTUs that were increased by sugar  
400 consumption and were negatively correlated with behavioral outcomes in rats fed early  
401 life sugar. *P. johnsonii* and *P. distasoni* species were cultured individually under  
402 anaerobic conditions and transferred to a group of antibiotic-treated young rats in a 1:1  
403 ratio via oral gavage using the experimental design described in Methods and outlined  
404 in Figure 3A, and from <sup>29</sup>. To confirm *Parabacteroides* enrichment, 16SrRNA  
405 sequencing was performed on rat fecal samples for SAL-SAL, ABX-SAL, and ABX-PARA  
406 groups. Alpha diversity was analyzed using observed operational taxonomic units  
407 (OTUs) (Figure 3B), where both ABX-SAL and ABX-PARA fecal samples have  
408 significantly reduced alpha diversity when compared with SAL-SAL fecal samples,  
409 suggesting that antibiotic treatment reduces microbiome alpha diversity. Further, either  
410 treatment with antibiotics alone or antibiotics followed by *Parabacteroides* significantly  
411 alters microbiota composition relative to the SAL-SAL group (Figure 3C). Taxonomic  
412 comparisons from 16S rRNA sequencing analysis were analyzed by analysis of

413 composition of microbiomes (ANCOM). Differential abundance on relative abundance  
414 at the species level (Figure 3D) was tested across samples hypothesis-free. Significant  
415 taxa at the species level were corrected for using false-discovery rate (FDR)-corrected  $P$ -  
416 values to calculate  $W$  in ANCOM. Comparing all groups resulted in the highest  $W$  value  
417 of 144 for the *Parabacteroides* genus, which was enriched in ABX-PARA fecal samples  
418 after bacterial gavage with an average relative abundance of 55.65% (Figure 3E). This  
419 confirms successful *Parabacteroides* enrichment for ABX-PARA rats post-gavage when  
420 compared to either ABX-SAL (average relative abundance of 5.47%) or ABX-SAL rats  
421 (average relative abundance of 0.26%).

422 All rats treated with antibiotics showed a reduction in food intake and body  
423 weight during the initial stages of antibiotic treatment, however, there were no  
424 differences in body weight between the two groups of antibiotic treated animals by  
425 PN50, at the time of behavioral testing (Figure S6A-C). Similar to a recent report <sup>48</sup>,  
426 *Parabacteroides* enrichment in the present study impacted body weight at later time  
427 points. Animals who received *P. johnsonii* and *P. distasonis* treatment showed reduced  
428 body weight 40 days after the transfer, with significantly lower lean mass (Figure S6D-  
429 F). There were no differences in percent body fat between groups, nor were there  
430 significant group differences in glucose metabolism in the IPGTT (Figure S6 G).  
431 Importantly, the body weights in the ABX-PARA group did not significantly differ from  
432 the ABX-SAL control group at the time of behavioral testing.

433 Results from the hippocampal-dependent NOIC memory task showed that while  
434 there were no differences in total exploration time of the combined objects on days 1 or  
435 3 of the task, indicating similar exploratory behavior, animals enriched with  
436 *Parabacteroides* showed a significantly reduced discrimination index in the NOIC task

437 compared with either control group (Figure 4A-C), indicating impaired performance in  
438 hippocampal-dependent memory function. When tested in the perirhinal cortex-  
439 dependent NOR task <sup>31</sup>, animals enriched with *Parabacteroides* showed impaired object  
440 recognition memory compared with the antibiotic treated control group as indicated by  
441 a reduced novel object exploration index (Figure 4D). These findings show that unlike  
442 sugar-fed animals, *Parabacteroides* enrichment impaired perirhinal cortex-dependent  
443 memory processes in addition to hippocampal-dependent memory.

444 Results from the zero maze showed no differences in time spent in the open arms  
445 nor in the number of open arm entries for the *Parabacteroides*-enriched rats relative to  
446 controls (Figure 4E, F), indicating that the enrichment did not affect anxiety-like  
447 behavior. Similarly, there were no differences in distance travelled or time spent in the  
448 center arena in the open field test, which is a measure of both anxiety-like behavior and  
449 general activity in rodents (Figure 4G, H). Together these data suggest that  
450 *Parabacteroides* treatment negatively impacted both hippocampal-dependent  
451 perirhinal cortex-dependent memory function without significantly affecting general  
452 activity or anxiety-like behavior.

453

#### 454 **Early life sugar consumption and *Parabacteroides* enrichment alter** 455 **hippocampal gene expression profiles**

456 To further investigate how sugar and *Parabacteroides* affect cognitive behaviors, we  
457 conducted transcriptome analysis of the hippocampus samples. Figure S7 (A, C) shows  
458 the results of principal component analysis revealing moderate separation based on  
459 RNA sequencing data from the dorsal hippocampus of rats fed sugar in early life  
460 compared with controls. Gene pathway enrichment analyses from RNA sequencing data

461 revealed multiple pathways significantly affected by early life sugar consumption,  
462 including four pathways involved in neurotransmitter synaptic signaling: dopaminergic,  
463 glutamatergic, cholinergic, and serotonergic signaling pathways. Additionally, several  
464 gene pathways that also varied by sugar were those involved in kinase-mediated  
465 intracellular signalling: cGMP-PKG, RAS, cAMP, and MAPK signaling pathways (Figure  
466 5A, Table S1).

467 Analyses of individual genes across the entire transcriptome using a stringent  
468 false-discovery rate criterion further identified 21 genes that were differentially  
469 expressed in rats fed early life sugar compared with controls, with 11 genes elevated and  
470 10 genes decreased in rats fed sugar compared to controls (Figure 5B). Among the genes  
471 impacted, several genes that regulate cell survival, migration, differentiation, and DNA  
472 repair were elevated by early life sugar access, including *Faap100*, which encodes an FA  
473 core complex member of the DNA damage response pathway <sup>49</sup>, and *Eepd1*, which  
474 transcribes an endonuclease involved in repairing stalled DNA replication forks,  
475 stressed from DNA damage <sup>50</sup>. Other genes associated with endoplasmic reticulum  
476 stress and synaptogenesis were also significantly increased by sugar consumption,  
477 including *Klf9*, *Dgkh*, *Neurod2*, *Ppl*, and *Kirrel1* <sup>51,52,53,54</sup>.

478 Several genes were reduced by dietary sugar, including *Tns2*, which encodes  
479 tensin 2, important for cell migration <sup>55</sup>, *RelA*, which encodes a NF/κB complex protein  
480 that regulates activity dependent neuronal function and synaptic plasticity <sup>56</sup>, and  
481 *Grm8*, the gene for the metabotropic glutamate receptor 8 (mGluR8). Notably, reduced  
482 expression of mGluR8 receptor may contribute to the impaired neurocognitive  
483 functioning in animals fed sugar, as mGluR8 knockout mice show impaired  
484 hippocampal-dependent learning and memory <sup>57</sup>.

485           Figure S7 (A-B, D) shows the results of principal component analysis of dorsal  
486 hippocampus RNA sequencing data indicating moderate separation between rats  
487 enriched with *Parabacteroides* and controls. Gene pathway analyses revealed that early  
488 life *Parabacteroides* treatment, similar to effects associated with sugar consumption,  
489 significantly altered the genetic signature of dopaminergic synaptic signaling pathways,  
490 though differentially expressed genes were commonly affected in opposite directions  
491 between the two experimental conditions (Figure S8). *Parabacteroides* treatment also  
492 impacted gene pathways associated with metabolic signaling. Specifically, pathways  
493 regulating fatty acid oxidation, rRNA metabolic processes, mitochondrial inner  
494 membrane, and valine, leucine, and isoleucine degradation were significantly affected by  
495 *Parabacteroides* enrichment. Other pathways that were influenced were those involved  
496 in neurodegenerative disorders, including Alzheimer's disease and Parkinson's disease,  
497 though most of the genes affected in these pathways were mitochondrial genes (Figure  
498 5D, Table S2).

499           At the level of individual genes, dorsal hippocampal RNA sequencing data  
500 revealed that 15 genes were differentially expressed in rats enriched with  
501 *Parabacteroides* compared with controls, with 13 genes elevated and two genes  
502 decreased in the *Parabacteroides* group compared with controls (Figure 6C). Consistent  
503 with results from gene pathway analyses, several individual genes involved in metabolic  
504 processes were elevated by *Parabacteroides* enrichment, such as *Hmgcs2*, which is a  
505 mitochondrial regulator of ketogenesis and provides energy to the brain under  
506 metabolically taxing conditions or when glucose availability is low <sup>58</sup>, and *Cox6b1*, a  
507 mitochondrial regulator of energy metabolism that improves hippocampal cellular  
508 viability following ischemia/reperfusion injury <sup>59</sup>. *Parabacteroides* enrichment was also

509 associated with increased expression of *Slc27A1* and *Mfrp*, which are each critical for the  
510 transport of fatty acids into the brain across capillary endothelial cells <sup>60,61</sup>.

511

512 **Discussion:**

513 Dietary factors are a key source of gut microbiome diversity <sup>29,47,62-64</sup> and  
514 emerging evidence indicates that diet-induced alterations in the gut microbiota may be  
515 linked with altered neurocognitive development <sup>29,64-66</sup>. Our results identify species  
516 within the genus *Parabacteroides* that are elevated by habitual early life consumption of  
517 dietary sugar and are negatively associated with hippocampal-dependent memory  
518 performance. Further, targeted microbiota enrichment of *Parabacteroides* perturbed  
519 both hippocampal- and perirhinal cortex-dependent memory performance. These  
520 findings are consistent with previous literature in showing that early life consumption of  
521 Western dietary factors impair neurocognitive outcomes <sup>10,11</sup>, and further suggest that  
522 altered gut bacteria due to excessive early life sugar consumption may functionally link  
523 dietary patterns with cognitive impairment.

524 Our previous data show that rats are not susceptible to habitual sugar  
525 consumption-induced learning and memory impairments when 11% sugar solutions are  
526 consumed ad libitum during adulthood, in contrast to effects observed in the present  
527 and previous study in which the sugar is consumed during early life development <sup>24</sup>. It is  
528 possible that habitual sugar consumption differentially affects the gut microbiome when  
529 consumed during adolescence vs. adulthood. However, a recent report showed that  
530 adult consumption of a high fructose diet (35% kcal from fructose) promotes gut  
531 microbial “dysbiosis” and neuroinflammation and cell death in the hippocampus, yet  
532 without impacting cognitive function <sup>67</sup>, suggesting that perhaps neurocognitive



533 function is more susceptible to gut microbiota influences during early life than during  
534 adulthood. Indeed, several reports have identified early life critical periods for  
535 microbiota influences on behavioral and neurochemical endpoints in germ free mice <sup>5,7</sup>  
536 <sup>6</sup>. However, the age-specific profile of sugar-associated microbiome dysbiosis and  
537 neurocognitive impairments remains to be determined.

538         Given that the adolescent rats consuming SSBs compensated for these calories by  
539 consuming less chow, it is possible that reduced nutrient (e.g., dietary protein)  
540 consumption may have contributed to the deficits in hippocampal function. However,  
541 we think this is unlikely, as adolescent SSB access did not produce any substantial  
542 nutrient deficiency that would restrict growth, as evidenced by the similarities in body  
543 weight between the experimental and control group. Furthermore, prior studies that  
544 directly examined the effects of adolescent caloric (and thereby nutrient) restriction on  
545 learning and memory in rats found that there were no differences in hippocampal-  
546 dependent memory function when rats were restricted by ~40% from PN 25-PN 67 <sup>68</sup>,  
547 Importantly, the parameters in this study closely match those in the present study, as  
548 our adolescent SSB access was given over a similar developmental period prior to  
549 behavioral testing, and produced a ~40% reduction in total chow kcal consumption.  
550 Thus, it is likely that excessive sugar consumption and not nutrient deficiency led to the  
551 memory deficits, although future work is needed to more carefully examine these  
552 variables independently.

553         While our study reveals a strong negative correlation between levels of fecal  
554 *Parabacteroides* and performance in the hippocampal-dependent contextual episodic  
555 memory NOIC task, as well as impaired NOIC performance in rats given access to a  
556 sugar solution during adolescence, sugar intake did not produce impairments in the



557 perirhinal cortex-dependent NOR memory task. This is consistent with our previous  
558 report in which rats given access to an 11% sugar solution during adolescence were  
559 impaired in hippocampal-dependent spatial memory (Barne's maze procedure), yet  
560 were not impaired in a nonspatial task of comparable difficulty that was not  
561 hippocampal-dependent<sup>24</sup>. Present results revealing that early life sugar consumption  
562 negatively impacts hippocampal-dependent contextual-based object recognition  
563 memory (NOIC) without influencing NOR memory performance is also consistent with  
564 previous reports using a cafeteria diet high in both fat content and sugar<sup>69,70</sup>. On the  
565 other hand, enrichment of *P. johnsonii* and *P. distasonis* in the present study impaired  
566 memory performance in both tasks, suggesting a broader impact on neurocognitive  
567 functioning with this targeted bacterial enrichment approach.

568         Gene pathway analyses from dorsal hippocampus RNA sequencing identified  
569 multiple neurobiological pathways that may functionally connect gut dysbiosis with  
570 memory impairment. Early life sugar consumption was associated with alterations in  
571 several neurotransmitter synaptic signaling pathways (e.g., glutamatergic, cholinergic)  
572 and intracellular signaling targets (e.g., cAMP, MAPK). A different profile was observed  
573 in *Parabacteroides*-enriched animals, where gene pathways involved with metabolic  
574 function (e.g., fatty acid oxidation, branched chain amino acid degradation) and  
575 neurodegenerative disease (e.g., Alzheimer's disease) were altered relative to controls.  
576 Given that sugar has effects on bacterial populations in addition to *Parabacteroides*,  
577 and that sugar consumption and *Parabacteroides* treatment differentially influenced  
578 peripheral glucose metabolism and body weight, these transcriptome differences in the  
579 hippocampus are not surprising. However, gene clusters involved with dopaminergic  
580 synaptic signaling were significantly influenced by both early life sugar consumption

581 and *Parabacteroides* treatment, thus identifying a common pathway through which  
582 both diet-induced and gut bacterial infusion-based elevations in *Parabacteroides* may  
583 influence neurocognitive development. Though differentially expressed genes were  
584 commonly affected in opposite directions in *Parabacteroides* enriched animals  
585 compared with early life sugar treated animals, it is possible that perturbations to the  
586 dopamine system play a role in the observed cognitive dysfunction. For example, while  
587 dopamine signaling in the hippocampus has not traditionally been investigated for  
588 mediating memory processes, several recent reports have identified a role for dopamine  
589 inputs from the locus coeruleus in regulating hippocampal-dependent memory and  
590 neuronal activity<sup>71,72</sup>. Interestingly, endogenous dopamine signaling in the  
591 hippocampus has recently been linked with regulating food intake and food-associated  
592 contextual learning<sup>73</sup>, suggesting that dietary effects on gut microbiota may also impact  
593 feeding behavior and energy balance-relevant cognitive processes.

594 It is important to note that comparisons between the gene expressional analyses  
595 in the *Parabacteroides* enrichment and sugar consumption experiments should be  
596 made cautiously given that there were slight differences in timing of the hippocampus  
597 tissue harvest between the two experiments (PN 65 for sugar consumption vs PN 83 for  
598 the *Parabacteroides* enrichment). Further, future work is needed to determine whether  
599 differences in gene expression observed in each experiment translates to differential  
600 expression at the protein level. It is also worth emphasizing that the levels of  
601 *Parabacteroides* conferred by our enrichment study were substantially higher than in  
602 the dietary sugar study, and thus it is not surprising that *Parabacteroides* enrichment  
603 would confer a different impact on host physiology, hippocampal gene expression, and  
604 neurocognition compared to *Parabacteroides* elevations associated with SSB

605 consumption. Regardless of these caveats in comparing the two models, our data extend  
606 the field by highlighting a specific bacterial population that 1) is capable of negatively  
607 impacting neurocognitive development when experimentally enriched, and 2) is  
608 elevated by early-life consumption of dietary sugar with levels correlating negatively  
609 with hippocampal-dependent memory performance.

610 Many of the genes that were differentially upregulated in the hippocampus by  
611 *Parabacteroides* enrichment were involved in fat metabolism and transport. Thus, it is  
612 possible that *Parabacteroides* conferred an adaptation in the brain, shifting fuel  
613 preference away from carbohydrate toward lipid-derived ketones. Consistent with this  
614 framework, *Parabacteroides* was previously shown to be upregulated by a ketogenic  
615 diet in which carbohydrate consumption is drastically depleted and fat is used as a  
616 primary fuel source due. Furthermore, enrichment of *Parabacteroides merdae* together  
617 with *Akkermansia muciniphila* was protective against seizures in mice <sup>29</sup>. It is possible  
618 that *P. distasonis* reduces glucose uptake from the gut, enhances glucose clearing from  
619 the blood, and/or alters nutrient utilization in general, an idea further supported by  
620 recent finding that *P. distasonis* is associated with reduced diet- and genetic-induced  
621 obesity and hyperglycemia in mice <sup>48</sup>.

622 The present findings produce several opportunities for further mechanistic  
623 investigation. For example, how do diet-induced alterations in gut bacteria impact the  
624 brain? Several possible mechanisms have been investigated and proposed, such as  
625 impaired gut barrier function and endotoxemia <sup>64,74</sup>, perhaps related to altered short  
626 chain fatty acid production <sup>67,75</sup>. Moreover it is well known that the liver is negatively  
627 impacted by excessive fructose consumption <sup>76</sup>, and emerging evidence highlights a gut  
628 microbiome-liver axis with crosstalk via bile acids and cytokines <sup>77</sup>. It is possible that

629 dietary sugar induced microbiota changes alter the hepatic-gut axis, thus contributing to  
630 altered cognitive function. Indeed, an altered bile acid profile due to gut microbiota  
631 produced bile acid secondary metabolites is associated with cognitive dysfunction in  
632 Alzheimer's Disease in humans <sup>78</sup>.

633 Taken together, our collective results provide insight into the neurobiological  
634 mechanisms that link early life unhealthy dietary patterns with altered gut microbiota  
635 changes and neurocognitive impairments. Currently probiotics, live microorganisms  
636 intended to confer health benefits, are not regulated with the same rigor as  
637 pharmaceuticals but instead are sold as dietary supplements. Our findings suggest that  
638 gut enrichment with certain species of *Parabacteroides* is potentially harmful for  
639 neurocognitive development. These results highlight the importance of  
640 conducting rigorous basic science analyses on the relationship between diet,  
641 microorganisms, brain, and behavior prior to widespread recommendations of bacterial  
642 microbiome interventions for humans.

643

#### 644 **Acknowledgements:**

645 We thank Alyssa Cortella for contributing the rodent artwork. We thank Caroline  
646 Szjewski, Lekha Chirala, Vaibhav Konanur, Sarah Terrill, and Ted Hsu for their critical  
647 contributions to the research. The research was supported by DK116942, DK104897,  
648 and institutional funds to S.E.K., DK118000 and DK111158 to E.E.N., DK116558 to  
649 A.N.S., DK 118944 to C.M.L. C.A.O. was supported by an F31 AG064844. E.Y.H. was  
650 supported by ARO MURI award W911NF-17-1-0402. DK104363 to X.Y., Eureka  
651 Scholarship and BWF-CHIP Fellowship to Y.C.

652

653 **Conflicts of interest:**

654 The authors declare no competing interests.

655 **References:**

- 656 1 Vuong, H. E., Yano, J. M., Fung, T. C. & Hsiao, E. Y. The Microbiome and Host Behavior.  
657 *Annu Rev Neurosci* **40**, 21-49, doi:10.1146/annurev-neuro-072116-031347 (2017).
- 658 2 Noble, E. E., Hsu, T. M. & Kanoski, S. E. Gut to Brain Dysbiosis: Mechanisms Linking  
659 Western Diet Consumption, the Microbiome, and Cognitive Impairment. *Front Behav*  
660 *Neurosci* **11**, 9, doi:10.3389/fnbeh.2017.00009 (2017).
- 661 3 Lach, G. *et al.* Enduring neurobehavioral effects induced by microbiota depletion during  
662 the adolescent period. *Transl Psychiatry* **10**, 382, doi:10.1038/s41398-020-01073-0  
663 (2020).
- 664 4 Morais, L. H. *et al.* Enduring Behavioral Effects Induced by Birth by Caesarean Section in  
665 the Mouse. *Curr Biol* **30**, 3761-3774 e3766, doi:10.1016/j.cub.2020.07.044 (2020).
- 666 5 Neufeld, K. A., Kang, N., Bienenstock, J. & Foster, J. A. Effects of intestinal microbiota on  
667 anxiety-like behavior. *Commun Integr Biol* **4**, 492-494, doi:10.4161/cib.4.4.15702 (2011).
- 668 6 Sudo, N. *et al.* Postnatal microbial colonization programs the hypothalamic-pituitary-  
669 adrenal system for stress response in mice. *J Physiol* **558**, 263-275,  
670 doi:10.1113/jphysiol.2004.063388 (2004).
- 671 7 Diaz Heijtz, R. *et al.* Normal gut microbiota modulates brain development and behavior.  
672 *Proc Natl Acad Sci U S A* **108**, 3047-3052, doi:10.1073/pnas.1010529108 (2011).
- 673 8 Cryan, J. F. *et al.* The Microbiota-Gut-Brain Axis. *Physiological reviews* **99**, 1877-2013,  
674 doi:10.1152/physrev.00018.2018 (2019).
- 675 9 Kanoski, S. E. & Davidson, T. L. Western diet consumption and cognitive impairment:  
676 links to hippocampal dysfunction and obesity. *Physiol Behav* **103**, 59-68,  
677 doi:10.1016/j.physbeh.2010.12.003 (2011).
- 678 10 Noble, E. E., Hsu, T. M., Liang, J. & Kanoski, S. E. Early-life sugar consumption has long-  
679 term negative effects on memory function in male rats. *Nutritional neuroscience*, 1-11,  
680 doi:10.1080/1028415X.2017.1378851 (2019).
- 681 11 Noble, E. E. & Kanoski, S. E. Early life exposure to obesogenic diets and learning and  
682 memory dysfunction. *Curr Opin Behav Sci* **9**, 7-14, doi:10.1016/j.cobeha.2015.11.014  
683 (2016).
- 684 12 Hsu, T. M. *et al.* Hippocampus ghrelin receptor signaling promotes socially-mediated  
685 learned food preference. *Neuropharmacology* **131**, 487-496,  
686 doi:10.1016/j.neuropharm.2017.11.039 (2018).
- 687 13 Hsu, T. M. *et al.* A hippocampus to prefrontal cortex neural pathway inhibits food  
688 motivation through glucagon-like peptide-1 signaling. *Mol Psychiatry* **23**, 1555-1565,  
689 doi:10.1038/mp.2017.91 (2018).
- 690 14 Hsu, T. M. *et al.* Hippocampus ghrelin signaling mediates appetite through lateral  
691 hypothalamic orexin pathways. *Elife* **4**, doi:10.7554/eLife.11190 (2015).
- 692 15 Kanoski, S. E., Fortin, S. M., Ricks, K. M. & Grill, H. J. Ghrelin signaling in the ventral  
693 hippocampus stimulates learned and motivational aspects of feeding via PI3K-Akt  
694 signaling. *Biol Psychiatry* **73**, 915-923, doi:10.1016/j.biopsych.2012.07.002 (2013).
- 695 16 Davidson, T. L. *et al.* Contributions of the hippocampus and medial prefrontal cortex to  
696 energy and body weight regulation. *Hippocampus* **19**, 235-252, doi:10.1002/hipo.20499  
697 (2009).

- 698 17 Kanoski, S. E. & Grill, H. J. Hippocampus Contributions to Food Intake Control:  
699 Mnemonic, Neuroanatomical, and Endocrine Mechanisms. *Biol Psychiatry* **81**, 748-756,  
700 doi:10.1016/j.biopsych.2015.09.011 (2017).
- 701 18 Kanoski, S. E. & Davidson, T. L. Western diet consumption and cognitive impairment:  
702 links to hippocampal dysfunction and obesity. *Physiol Behav* **103**, 59-68,  
703 doi:10.1016/j.physbeh.2010.12.003 (2011).
- 704 19 Davidson, T. L., Sample, C. H. & Swithers, S. E. An application of Pavlovian principles to  
705 the problems of obesity and cognitive decline. *Neurobiology of learning and memory*  
706 **108**, 172-184, doi:10.1016/j.nlm.2013.07.014 (2014).
- 707 20 Baym, C. L. *et al.* Dietary lipids are differentially associated with hippocampal-dependent  
708 relational memory in prepubescent children. *Am J Clin Nutr* **99**, 1026-1032,  
709 doi:10.3945/ajcn.113.079624 (2014).
- 710 21 Valladolid-Acebes, I. *et al.* Spatial memory impairment and changes in hippocampal  
711 morphology are triggered by high-fat diets in adolescent mice. Is there a role of leptin?  
712 *Neurobiol Learn Mem* **106**, 18-25, doi:10.1016/j.nlm.2013.06.012 (2013).
- 713 22 Boitard, C. *et al.* Impairment of hippocampal-dependent memory induced by juvenile  
714 high-fat diet intake is associated with enhanced hippocampal inflammation in rats. *Brain*  
715 *Behav Immun* **40**, 9-17, doi:10.1016/j.bbi.2014.03.005 (2014).
- 716 23 Boitard, C. *et al.* Juvenile, but not adult exposure to high-fat diet impairs relational  
717 memory and hippocampal neurogenesis in mice. *Hippocampus* **22**, 2095-2100,  
718 doi:10.1002/hipo.22032 (2012).
- 719 24 Hsu, T. M. *et al.* Effects of sucrose and high fructose corn syrup consumption on spatial  
720 memory function and hippocampal neuroinflammation in adolescent rats. *Hippocampus*  
721 **25**, 227-239, doi:10.1002/hipo.22368 (2015).
- 722 25 Kendig, M. D., Boakes, R. A., Rooney, K. B. & Corbit, L. H. Chronic restricted access to  
723 10% sucrose solution in adolescent and young adult rats impairs spatial memory and  
724 alters sensitivity to outcome devaluation. *Physiol Behav* **120**, 164-172,  
725 doi:10.1016/j.physbeh.2013.08.012 (2013).
- 726 26 Reichelt, A. C., Killcross, S., Hambly, L. D., Morris, M. J. & Westbrook, R. F. Impact of  
727 adolescent sucrose access on cognitive control, recognition memory, and parvalbumin  
728 immunoreactivity. *Learn Mem* **22**, 215-224, doi:10.1101/lm.038000.114 (2015).
- 729 27 Noble, E. E., Hsu, T. M., Liang, J. & Kanoski, S. E. Early-life sugar consumption has long-  
730 term negative effects on memory function in male rats. *Nutr Neurosci* **22**, 273-283,  
731 doi:10.1080/1028415X.2017.1378851 (2019).
- 732 28 Walker, R. W., Dumke, K. A. & Goran, M. I. Fructose content in popular beverages made  
733 with and without high-fructose corn syrup. *Nutrition* **30**, 928-935,  
734 doi:10.1016/j.nut.2014.04.003 (2014).
- 735 29 Olson, C. A. *et al.* The Gut Microbiota Mediates the Anti-Seizure Effects of the Ketogenic  
736 Diet. *Cell* **173**, 1728-1741 e1713, doi:10.1016/j.cell.2018.04.027 (2018).
- 737 30 Martinez, M. C., Villar, M. E., Ballarini, F. & Viola, H. Retroactive interference of object-  
738 in-context long-term memory: role of dorsal hippocampus and medial prefrontal cortex.  
739 *Hippocampus* **24**, 1482-1492, doi:10.1002/hipo.22328 (2014).



- 740 31 Balderas, I. *et al.* The consolidation of object and context recognition memory involve  
741 different regions of the temporal lobe. *Learn Mem* **15**, 618-624,  
742 doi:10.1101/lm.1028008 (2008).
- 743 32 Beilharz, J. E., Maniam, J. & Morris, M. J. Short exposure to a diet rich in both fat and  
744 sugar or sugar alone impairs place, but not object recognition memory in rats. *Brain*  
745 *Behav Immun* **37**, 134-141, doi:10.1016/j.bbi.2013.11.016 (2014).
- 746 33 Thompson, L. R. *et al.* A communal catalogue reveals Earth's multiscale microbial  
747 diversity. *Nature* **551**, 457-463, doi:10.1038/nature24621 (2017).
- 748 34 Caporaso, J. G. *et al.* Ultra-high-throughput microbial community analysis on the  
749 Illumina HiSeq and MiSeq platforms. *ISME J* **6**, 1621-1624, doi:10.1038/ismej.2012.8  
750 (2012).
- 751 35 Patro, R., Duggal, G., Love, M. I., Irizarry, R. A. & Kingsford, C. Salmon provides fast and  
752 bias-aware quantification of transcript expression. *Nat Methods* **14**, 417-419,  
753 doi:10.1038/nmeth.4197 (2017).
- 754 36 Sonesson, C., Love, M. I. & Robinson, M. D. Differential analyses for RNA-seq: transcript-  
755 level estimates improve gene-level inferences. *F1000Res* **4**, 1521,  
756 doi:10.12688/f1000research.7563.2 (2015).
- 757 37 Anders, S. & Huber, W. Differential expression analysis for sequence count data.  
758 *Genome Biol* **11**, R106, doi:10.1186/gb-2010-11-10-r106 (2010).
- 759 38 Kuleshov, M. V. *et al.* Enrichr: a comprehensive gene set enrichment analysis web server  
760 2016 update. *Nucleic Acids Res* **44**, W90-97, doi:10.1093/nar/gkw377 (2016).
- 761 39 Kanehisa, M., Furumichi, M., Tanabe, M., Sato, Y. & Morishima, K. KEGG: new  
762 perspectives on genomes, pathways, diseases and drugs. *Nucleic Acids Res* **45**, D353-  
763 D361, doi:10.1093/nar/gkw1092 (2017).
- 764 40 The Gene Ontology, C. Expansion of the Gene Ontology knowledgebase and resources.  
765 *Nucleic Acids Res* **45**, D331-D338, doi:10.1093/nar/gkw1108 (2017).
- 766 41 Slenter, D. N. *et al.* WikiPathways: a multifaceted pathway database bridging  
767 metabolomics to other omics research. *Nucleic Acids Res* **46**, D661-D667,  
768 doi:10.1093/nar/gkx1064 (2018).
- 769 42 Aggleton, J. P. & Brown, M. W. Contrasting hippocampal and perirhinal cortex function  
770 using immediate early gene imaging. *Q J Exp Psychol B* **58**, 218-233,  
771 doi:10.1080/02724990444000131 (2005).
- 772 43 Albasser, M. M., Davies, M., Futter, J. E. & Aggleton, J. P. Magnitude of the object  
773 recognition deficit associated with perirhinal cortex damage in rats: Effects of varying  
774 the lesion extent and the duration of the sample period. *Behav Neurosci* **123**, 115-124,  
775 doi:10.1037/a0013829 (2009).
- 776 44 Cohen, S. J. & Stackman, R. W., Jr. Assessing rodent hippocampal involvement in the  
777 novel object recognition task. A review. *Behav Brain Res* **285**, 105-117,  
778 doi:10.1016/j.bbr.2014.08.002 (2015).
- 779 45 Sestakova, N., Puzserova, A., Kluknavsky, M. & Bernatova, I. Determination of motor  
780 activity and anxiety-related behaviour in rodents: methodological aspects and role of  
781 nitric oxide. *Interdiscip Toxicol* **6**, 126-135, doi:10.2478/intox-2013-0020 (2013).
- 782 46 Goran, M. I. *et al.* The obesogenic effect of high fructose exposure during early  
783 development. *Nat Rev Endocrinol* **9**, 494-500, doi:10.1038/nrendo.2013.108 (2013).



- 784 47 Noble, E. E. *et al.* Early-Life Sugar Consumption Affects the Rat Microbiome  
785 Independently of Obesity. *J Nutr* **147**, 20-28, doi:10.3945/jn.116.238816 (2017).
- 786 48 Wang, K. *et al.* Parabacteroides distasonis Alleviates Obesity and Metabolic Dysfunctions  
787 via Production of Succinate and Secondary Bile Acids. *Cell Rep* **26**, 222-235 e225,  
788 doi:10.1016/j.celrep.2018.12.028 (2019).
- 789 49 Ling, C. *et al.* FAAP100 is essential for activation of the Fanconi anemia-associated DNA  
790 damage response pathway. *EMBO J* **26**, 2104-2114, doi:10.1038/sj.emboj.7601666  
791 (2007).
- 792 50 Kim, H. S. *et al.* Endonuclease EEPD1 Is a Gatekeeper for Repair of Stressed Replication  
793 Forks. *J Biol Chem* **292**, 2795-2804, doi:10.1074/jbc.M116.758235 (2017).
- 794 51 Zucker, S. N. *et al.* Nrf2 amplifies oxidative stress via induction of Klf9. *Mol Cell* **53**, 916-  
795 928, doi:10.1016/j.molcel.2014.01.033 (2014).
- 796 52 Yasuda, S. *et al.* Diacylglycerol kinase eta augments C-Raf activity and B-Raf/C-Raf  
797 heterodimerization. *J Biol Chem* **284**, 29559-29570, doi:10.1074/jbc.M109.043604  
798 (2009).
- 799 53 Murdoch, H. *et al.* Periplakin interferes with G protein activation by the melanin-  
800 concentrating hormone receptor-1 by binding to the proximal segment of the receptor  
801 C-terminal tail. *J Biol Chem* **280**, 8208-8220, doi:10.1074/jbc.M405215200 (2005).
- 802 54 Gerke, P. *et al.* Neuronal expression and interaction with the synaptic protein CASK  
803 suggest a role for Neph1 and Neph2 in synaptogenesis. *J Comp Neurol* **498**, 466-475,  
804 doi:10.1002/cne.21064 (2006).
- 805 55 Chen, H., Duncan, I. C., Bozorgchami, H. & Lo, S. H. Tensin1 and a previously  
806 undocumented family member, tensin2, positively regulate cell migration. *Proc Natl*  
807 *Acad Sci U S A* **99**, 733-738, doi:10.1073/pnas.022518699 (2002).
- 808 56 O'Mahony, A. *et al.* NF-kappaB/Rel regulates inhibitory and excitatory neuronal function  
809 and synaptic plasticity. *Mol Cell Biol* **26**, 7283-7298, doi:10.1128/MCB.00510-06 (2006).
- 810 57 Gerlai, R., Adams, B., Fitch, T., Chaney, S. & Baez, M. Performance deficits of mGluR8  
811 knockout mice in learning tasks: the effects of null mutation and the background  
812 genotype. *Neuropharmacology* **43**, 235-249, doi:10.1016/s0028-3908(02)00078-3  
813 (2002).
- 814 58 Shao, X. *et al.* HMG-CoA synthase 2 drives brain metabolic reprogramming in cocaine  
815 exposure. *Neuropharmacology* **148**, 377-393, doi:10.1016/j.neuropharm.2017.10.001  
816 (2019).
- 817 59 Yang, S., Wu, P., Xiao, J. & Jiang, L. Overexpression of COX6B1 protects against  
818 I/R-induced neuronal injury in rat hippocampal neurons. *Mol Med Rep* **19**, 4852-4862,  
819 doi:10.3892/mmr.2019.10144 (2019).
- 820 60 Ochiai, Y. *et al.* The blood-brain barrier fatty acid transport protein 1 (FATP1/SLC27A1)  
821 supplies docosahexaenoic acid to the brain, and insulin facilitates transport. *J*  
822 *Neurochem* **141**, 400-412, doi:10.1111/jnc.13943 (2017).
- 823 61 Kautzmann, M. I. *et al.* Membrane-type frizzled-related protein regulates lipidome and  
824 transcription for photoreceptor function. *FASEB J* **34**, 912-929,  
825 doi:10.1096/fj.201902359R (2020).
- 826 62 David, L. A. *et al.* Diet rapidly and reproducibly alters the human gut microbiome. *Nature*  
827 **505**, 559-563, doi:10.1038/nature12820 (2014).

- 828 63 de La Serre, C. B. *et al.* Propensity to high-fat diet-induced obesity in rats is associated  
829 with changes in the gut microbiota and gut inflammation. *Am J Physiol Gastrointest Liver*  
830 *Physiol* **299**, G440-448, doi:10.1152/ajpgi.00098.2010 (2010).
- 831 64 Bruce-Keller, A. J. *et al.* Obese-type gut microbiota induce neurobehavioral changes in  
832 the absence of obesity. *Biol Psychiatry* **77**, 607-615, doi:10.1016/j.biopsych.2014.07.012  
833 (2015).
- 834 65 Leigh, S. J., Kaakoush, N. O., Westbrook, R. F. & Morris, M. J. Minocycline-induced  
835 microbiome alterations predict cafeteria diet-induced spatial recognition memory  
836 impairments in rats. *Transl Psychiatry* **10**, 92, doi:10.1038/s41398-020-0774-1 (2020).
- 837 66 Leigh, S. J., Kaakoush, N. O., Bertoldo, M. J., Westbrook, R. F. & Morris, M. J.  
838 Intermittent cafeteria diet identifies fecal microbiome changes as a predictor of spatial  
839 recognition memory impairment in female rats. *Transl Psychiatry* **10**, 36,  
840 doi:10.1038/s41398-020-0734-9 (2020).
- 841 67 Li, J. M. *et al.* Dietary fructose-induced gut dysbiosis promotes mouse hippocampal  
842 neuroinflammation: a benefit of short-chain fatty acids. *Microbiome* **7**, 98,  
843 doi:10.1186/s40168-019-0713-7 (2019).
- 844 68 Alamy, M., Errami, M., Taghzouti, K., Saddiki-Traki, F. & Bengelloun, W. A. Effects of  
845 postweaning undernutrition on exploratory behavior, memory and sensory reactivity in  
846 rats: implication of the dopaminergic system. *Physiol Behav* **86**, 195-202,  
847 doi:10.1016/j.physbeh.2005.07.008 (2005).
- 848 69 Kendig, M. D., Westbrook, R. F. & Morris, M. J. Pattern of access to cafeteria-style diet  
849 determines fat mass and degree of spatial memory impairments in rats. *Sci Rep* **9**,  
850 13516, doi:10.1038/s41598-019-50113-3 (2019).
- 851 70 Yang, Y. *et al.* Early-life high-fat diet-induced obesity programs hippocampal  
852 development and cognitive functions via regulation of gut commensal *Akkermansia*  
853 *muciniphila*. *Neuropsychopharmacology* **44**, 2054-2064, doi:10.1038/s41386-019-0437-1  
854 (2019).
- 855 71 Takeuchi, T. *et al.* Locus coeruleus and dopaminergic consolidation of everyday memory.  
856 *Nature* **537**, 357-362, doi:10.1038/nature19325 (2016).
- 857 72 Kempadoo, K. A., Mosharov, E. V., Choi, S. J., Sulzer, D. & Kandel, E. R. Dopamine release  
858 from the locus coeruleus to the dorsal hippocampus promotes spatial learning and  
859 memory. *Proc Natl Acad Sci U S A* **113**, 14835-14840, doi:10.1073/pnas.1616515114  
860 (2016).
- 861 73 Azevedo, E. P. *et al.* A Role of Drd2 Hippocampal Neurons in Context-Dependent Food  
862 Intake. *Neuron* **102**, 873-886 e875, doi:10.1016/j.neuron.2019.03.011 (2019).
- 863 74 Ou, Z. *et al.* Protective effects of *Akkermansia muciniphila* on cognitive deficits and  
864 amyloid pathology in a mouse model of Alzheimer's disease. *Nutr Diabetes* **10**, 12,  
865 doi:10.1038/s41387-020-0115-8 (2020).
- 866 75 Hu, L. *et al.* High Salt Elicits Brain Inflammation and Cognitive Dysfunction, Accompanied  
867 by Alternations in the Gut Microbiota and Decreased SCFA Production. *J Alzheimers Dis*  
868 **77**, 629-640, doi:10.3233/JAD-200035 (2020).
- 869 76 Stanhope, K. L. Sugar consumption, metabolic disease and obesity: The state of the  
870 controversy. *Crit Rev Clin Lab Sci* **53**, 52-67, doi:10.3109/10408363.2015.1084990  
871 (2016).

872 77 Cerdo, T., Dieguez, E. & Campoy, C. Early nutrition and gut microbiome:  
873 interrelationship between bacterial metabolism, immune system, brain structure, and  
874 neurodevelopment. *Am J Physiol Endocrinol Metab* **317**, E617-E630,  
875 doi:10.1152/ajpendo.00188.2019 (2019).  
876 78 MahmoudianDehkordi, S. *et al.* Altered bile acid profile associates with cognitive  
877 impairment in Alzheimer's disease-An emerging role for gut microbiome. *Alzheimers*  
878 *Dement* **15**, 76-92, doi:10.1016/j.jalz.2018.07.217 (2019).  
879

880

## 881 Figure Legends

882

883 **Figure 1: Early-life sugar consumption negatively impacts hippocampal-**  
884 **dependent memory function.** (A, B) Early life sugar consumption had no effect on  
885 total exploration time on days 1 (familiarization) or day 3 (test day) of the Novel Object  
886 in Context (NOIC) task. (C) The discrimination index was significantly reduced by early  
887 life sugar consumption, indicating impaired hippocampal function ( $P < .05$ ,  $n=10,11$ ;  
888 two-tailed, type 2 Student's T-test). (D) There were no differences in exploration index  
889 in the Novel Object Recognition (NOR task) ( $n=6$ ; two-tailed, type 2 Student's T-test).  
890 (E, F) There were no differences in time spent in the open arm or the number of entries  
891 into the open arm in the Zero Maze task for anxiety-like behavior ( $n=10$ ; two-tailed, type  
892 2 Student's t-test). (G, H) There were no differences in distance travelled or time spent  
893 in the center arena in the Open Field task ( $n=8$ ; two-tailed, type 2 Student's T-test). (I)  
894 There were no differences in body fat % during adulthood between rats fed early life  
895 sugar and controls ( $n=10,11$ ; two-tailed, type 2 Student's T-test). (J-K) Body weights and  
896 total energy intake did not differ between the groups ( $n=10,11$ ; two- way repeated  
897 measures ANOVA), despite (L) increased kcal consumption from sugar sweetened

898 beverages in the sugar group. CTL=control, SUG= sugar, PN= post-natal day; data  
899 shown as mean  $\pm$  SEM.

900

901

902 **Figure 2: Effect of adolescent sugar consumption on the gut microbiome in**

903 **rats.** (A) Principal component analysis showing separation between fecal microbiota of

904 rats fed early life sugar or controls (n=11, 10; dark triangles= sugar, open circles=

905 control). (B) Results from LefSe analysis showing Linear Discriminate Analysis (LDA)

906 scores for microbiome analysis of fecal samples of rats fed early life sugar or controls.

907 (C) A cladogram representing the results from the LefSe analysis with class as the outer

908 most taxonomic level and species at the inner most level. Taxa in red are elevated in the

909 sugar group. (D) Relative % abundance of fecal *Parabacteroides* are significantly

910 elevated in rats fed early life sugar ( $P < .05$ ; n=11, 10, two-tailed, type 2 Student's T-test).

911 (E) Linear regression of log normalized fecal *Parabacteroides* counts against shift from

912 baseline performance scores in the novel object in context task (NOIC) across all groups

913 tested (n=21). (E, F) Linear regression of the most abundant fecal *Parabacteroides*

914 species against shift from baseline performance scores in NOIC across all groups tested

915 (n=21). \* $P < 0.05$ ; data shown as mean  $\pm$  SEM.

916

917

918 **Figure 3: Intestinal *Parabacteroides* is enriched by antibiotic treatment**

919 **and oral gavage of *P. distasonis* and *P. johnsonii*.** A) Schematic showing the

920 timeline for the experimental design of the *Parabacteroides* transfer experiment. B)

921 Alpha diversity based on 16S rRNA gene profiling of fecal matter (n=7-8) represented by

922 observed operational taxonomic units (OTUs) for a given number of sample sequences.  
923 C) Principal coordinates analysis of weighted UniFrac distance based on 16S rRNA gene  
924 profiling of feces for SAL-SAL, ABX-SAL, and ABX-PARA enriched rats (n=7-8). D)  
925 Average taxonomic distributions of bacteria from 16S rRNA gene sequencing data of  
926 feces for SAL-SAL, ABX-SAL, and ABX-PARA enriched animals (n=7-8). E) Relative  
927 abundances of *Parabacteroides* in fecal microbiota for SAL-SAL, ABX-SAL, and ABX-  
928 PARA enriched animals (n=7-8) (ANCOM). PN= post-natal day, IP GTT=  
929 intraperitoneal glucose tolerance test. Data are presented as mean  $\pm$  S.E.M. \*  $p < 0.05$ ,  
930 \*\* $p < 0.01$ , \*\*\* $p < 0.001$ . n.s.=not statistically significant. SAL-SAL= rats treated with  
931 saline, ABX-SAL=rats treated with antibiotics followed by sterile saline gavage, ABX-  
932 PARA= rats treated with antibiotics followed by a 1:1 gavage of *Parabacteroides*  
933 *distasonis* and *Parabacteroides johnsonii*.

934

935

936 **Figure 4: Early-life enrichment with *Parabacteroides* negatively impacts**  
937 **neurocognitive function.** (A, B) Early-life enrichment with a 1:1 ratio of *P. johnsonii*  
938 and *P. distasonis* had no effect on total exploration time in the Novel Object in Context  
939 (NOIC) task. (C) Discrimination index was significantly reduced by enrichment with *P.*  
940 *johnsonii* and *P. distasonis*, indicating impaired hippocampal function (n=7,8;  $F_{(2,19)} =$   
941 4.92;  $P < .05$ , one-way ANOVA with Tukey's multiple comparison test). (D) There was a  
942 significant reduction in the exploration index in the Novel Object Recognition (NOR  
943 task), indicating impaired perirhinal cortex function (n=7,8;  $F_{(2,19)} = 3.61$ ;  $P < .05$ , one-  
944 way ANOVA with Tukey's multiple comparison test). (E, F) There were no differences in  
945 time spent or number of entries into the open arm by animals with *P. johnsonii* and *P.*

946 *distasonis* enrichment in the Zero Maze task for anxiety-like behavior (n=7,8; one-way  
947 ANOVA). (G, H) There were no differences in distance travelled or time spent in the  
948 center arena in the Open Field task (n=7,8; one-way ANOVA). SAL-SAL=saline-saline  
949 control, ABX-SAL= antibiotics-saline control, ABX-PARA= antibiotics-*P. johnsonii* and  
950 *P. distasonis* enriched, PN= post-natal day; data shown as mean  $\pm$  SEM; \*  $P < .05$ .

951

952

953 **Figure 5: Effect of early life sugar or targeted *Parabacteroides* enrichment**  
954 **on hippocampal gene expression.** (A) Pathway analyses for differentially expressed  
955 genes (DEGs) at a p-value  $< 0.01$  in hippocampal tissue punches from rats fed early life  
956 sugar compared with controls. Upregulation by sugar is shown in red and  
957 downregulation by sugar in blue. (B) A heatmap depicting DEGs that survived the  
958 Benjamini-Hochberg corrected FDR of  $P < 0.05$  in rats fed early life sugar compared  
959 with controls. Warmer colors (red) signify an increase in gene expression and cool  
960 colors (blue) a reduction in gene expression by treatment (CTL=control, SUG= early life  
961 sugar; n=7/group). (C) A heatmap depicting DEGs that survived the Benjamini-  
962 Hochberg corrected FDR of  $P < 0.05$  in rats with early life *Parabacteroides* enrichment  
963 compared with combined control groups. Warmer colors (red) signify an increase in  
964 gene expression and cool colors (blue) a reduction in gene expression by treatment  
965 (n=7, 14). (D) Pathway analyses for differentially expressed genes (DEGs) at a P-value  $<$   
966  $0.01$  in rats enriched with *Parabacteroides* compared with combined controls.  
967 Upregulation by *Parabacteroides* transfer is shown in red and downregulation in blue.  
968 Dotted line indicates  $\pm 0.25 \log_2$  fold change.

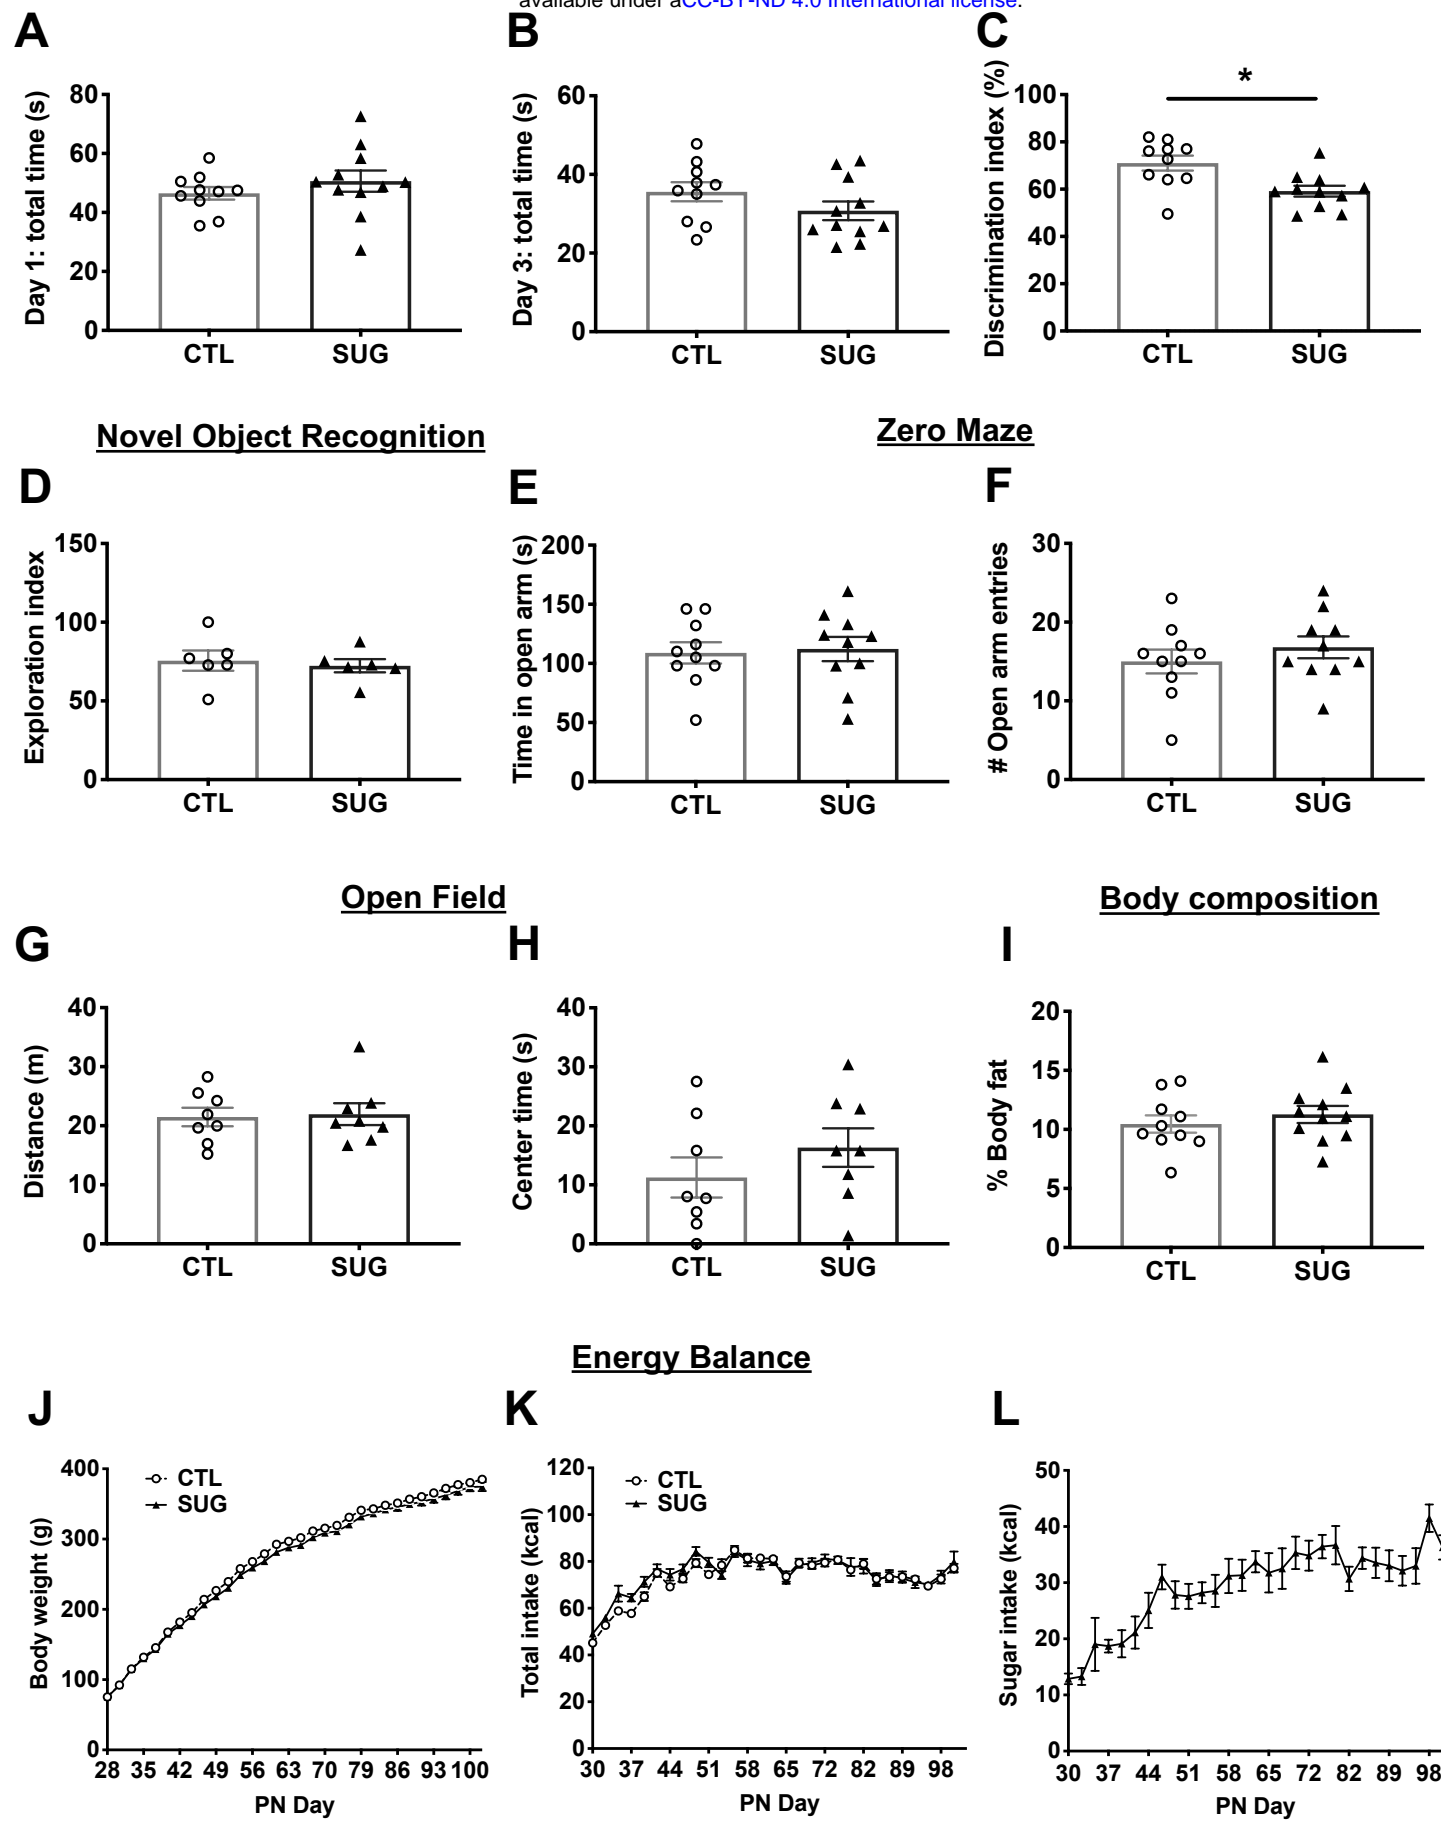



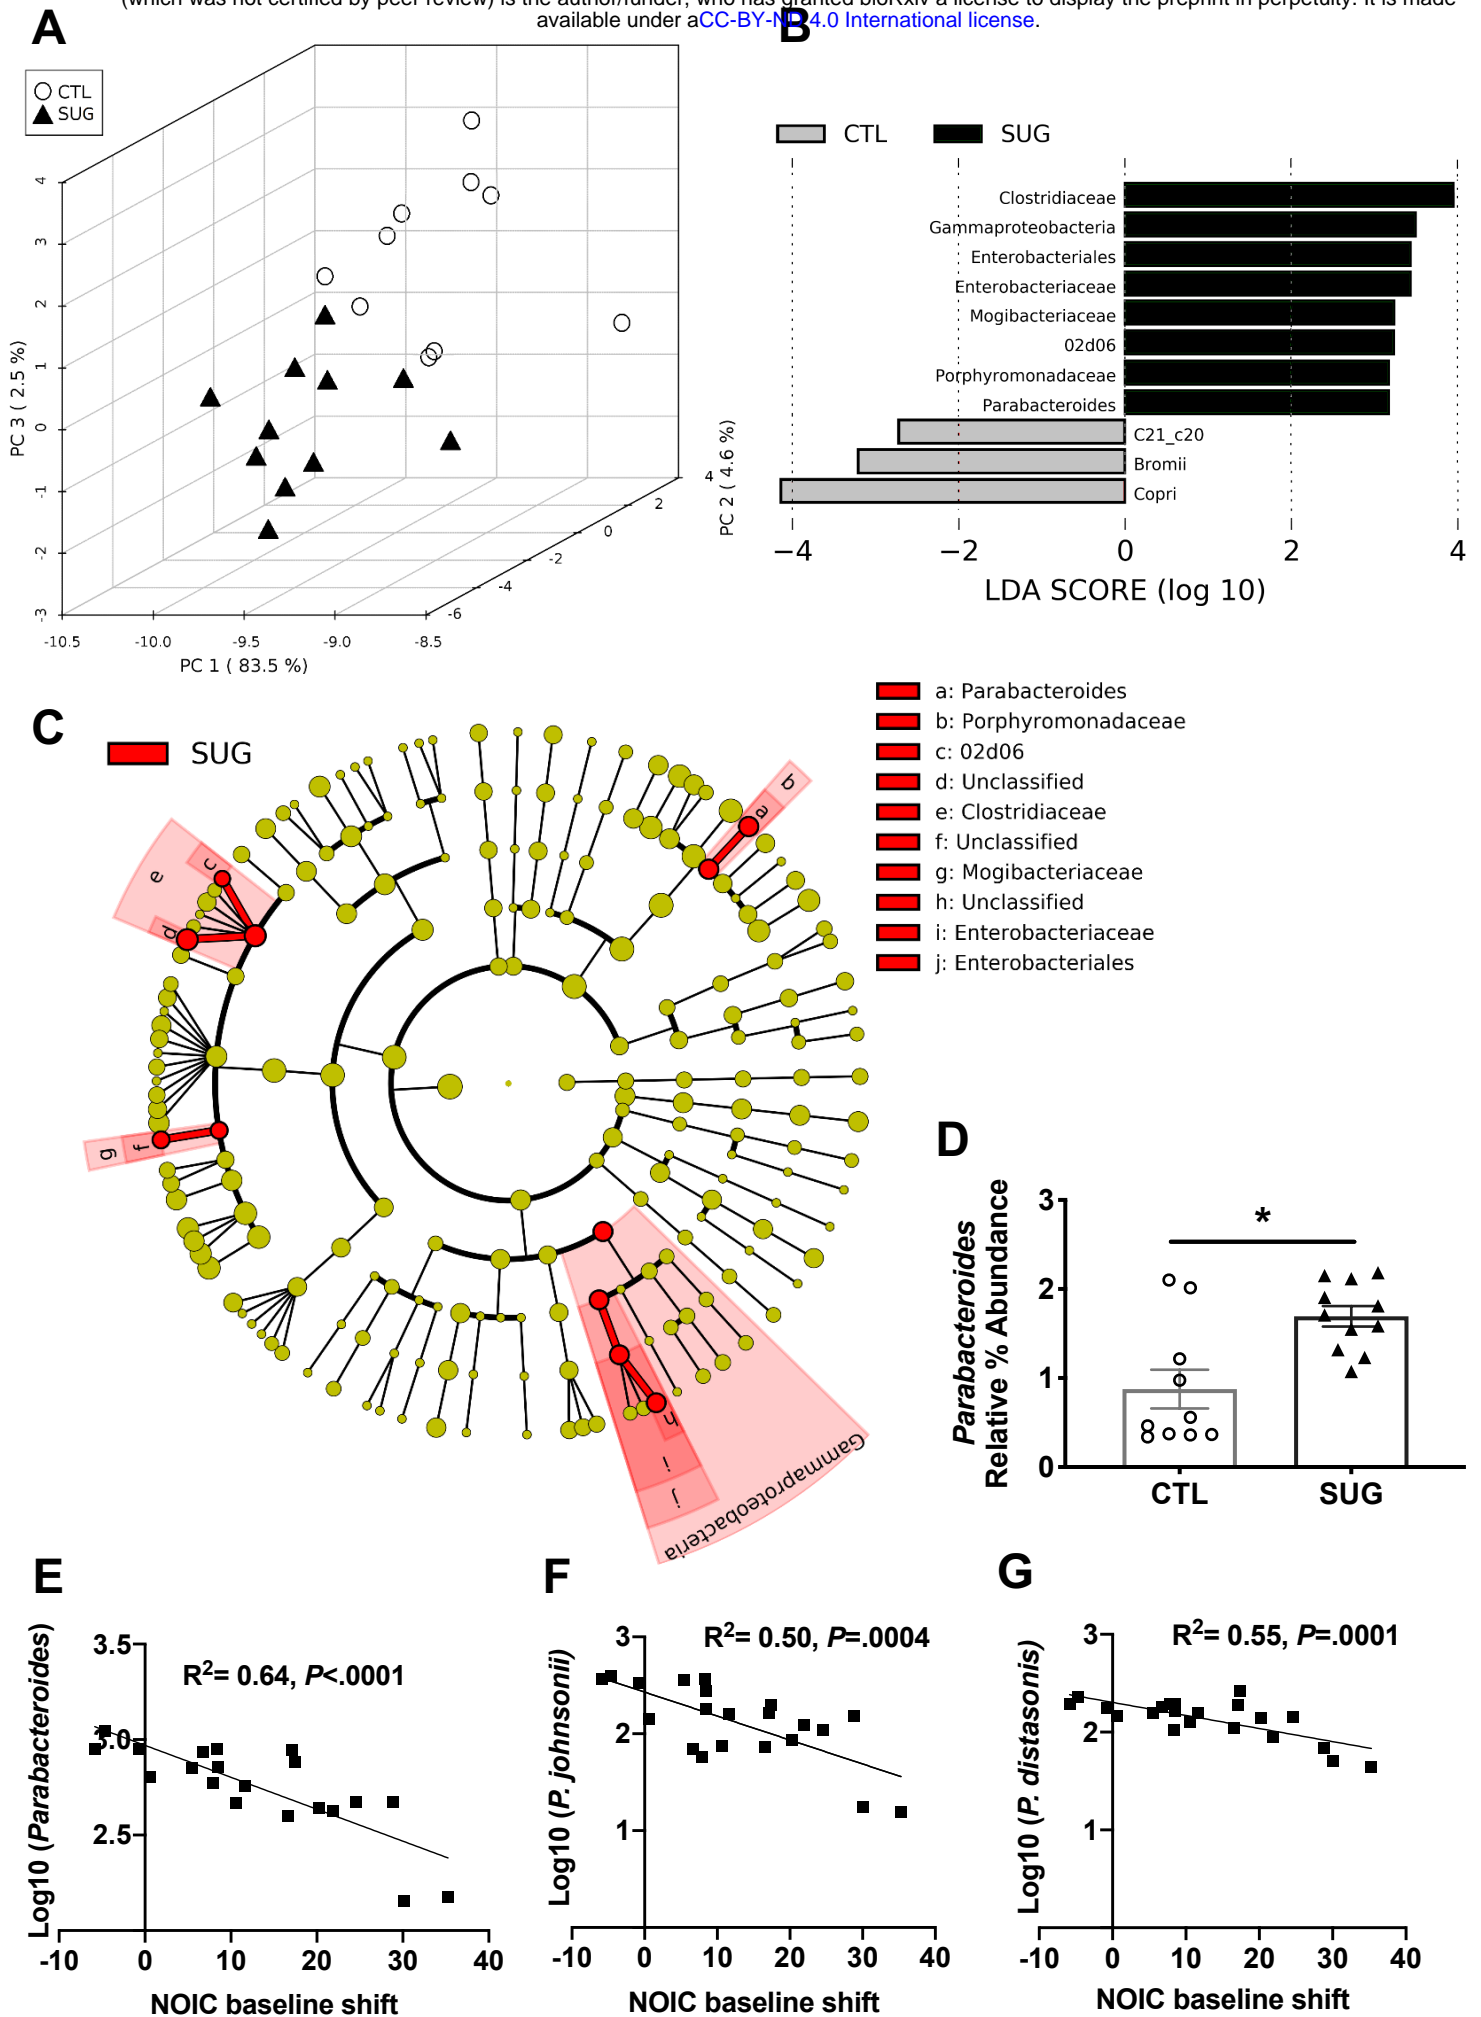



Figure 3

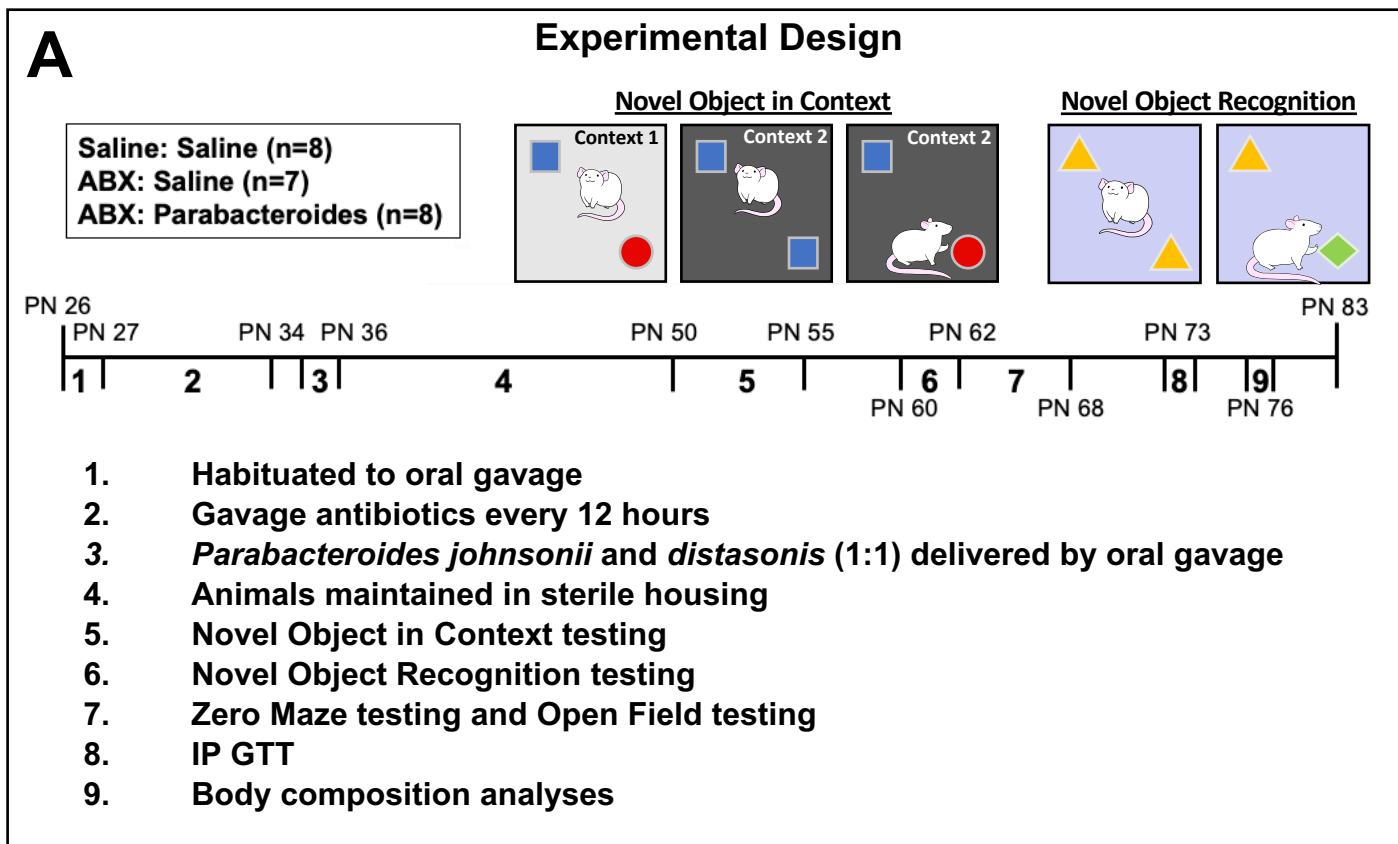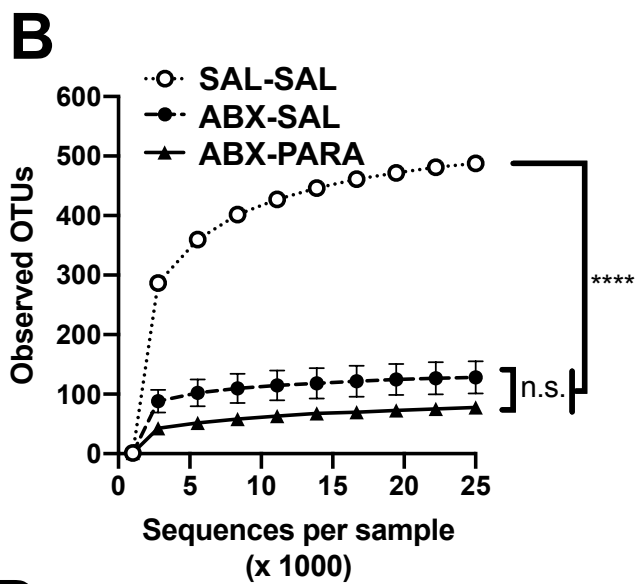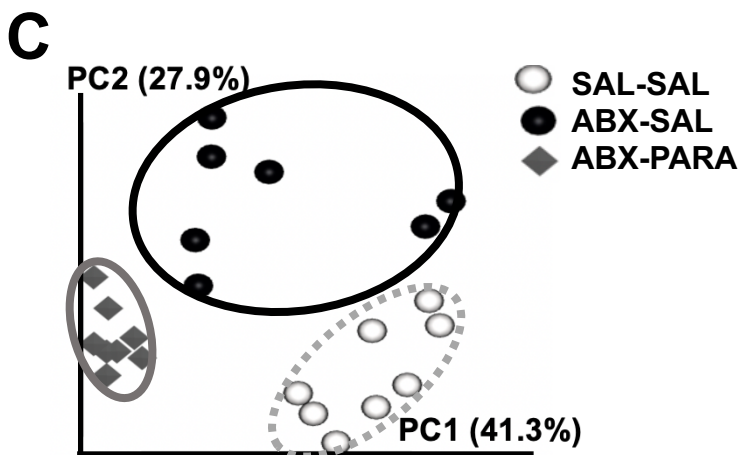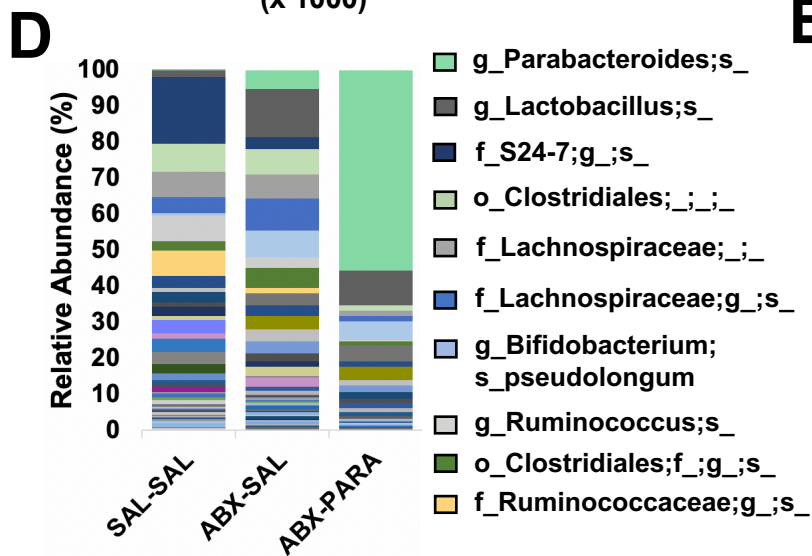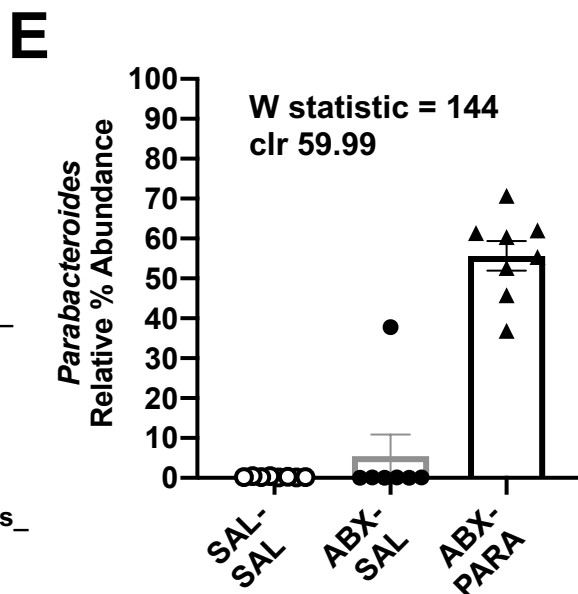

Figure 4

Novel Object in Context

**A**

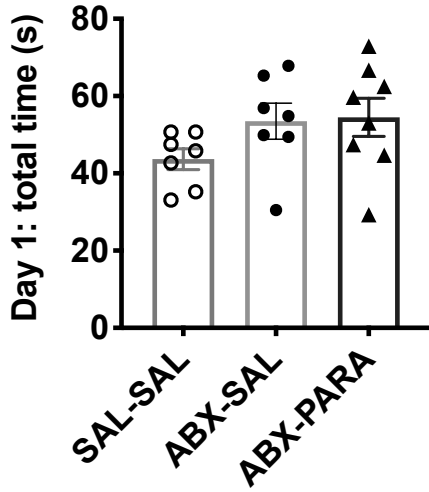

**B**

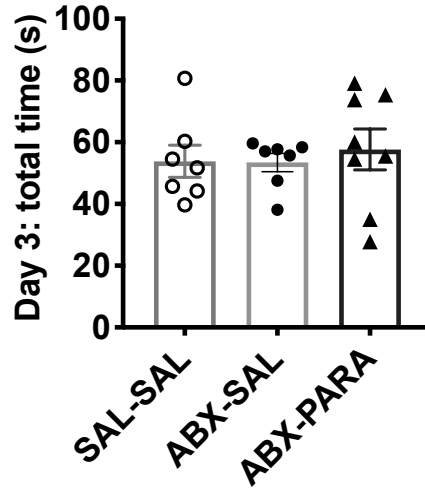

**C**

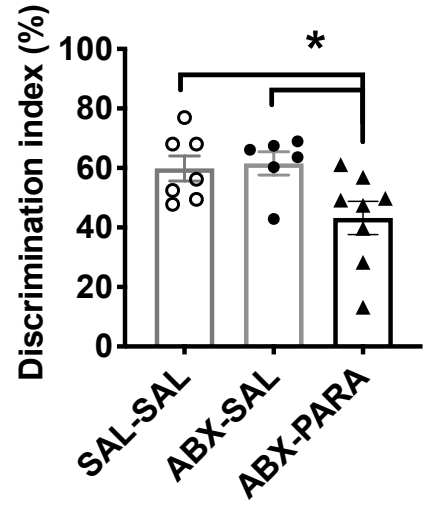

Novel Object Recognition

Zero Maze

**D**

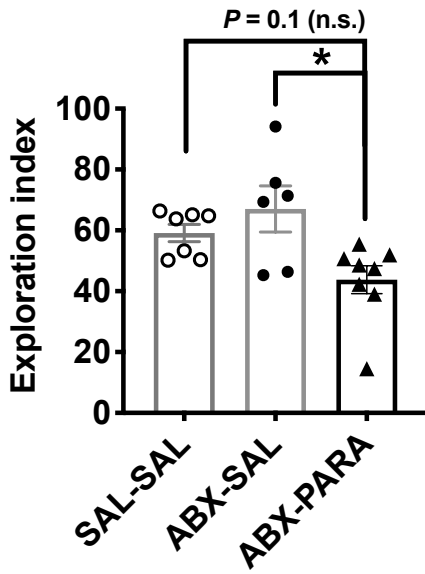

**E**

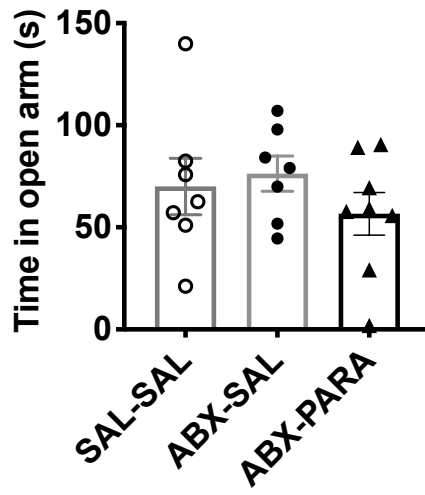

**F**

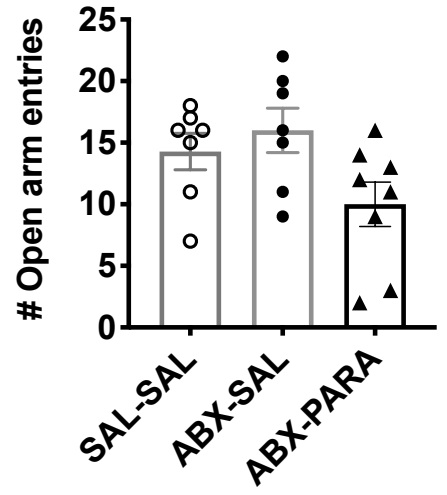

**G**

Open Field

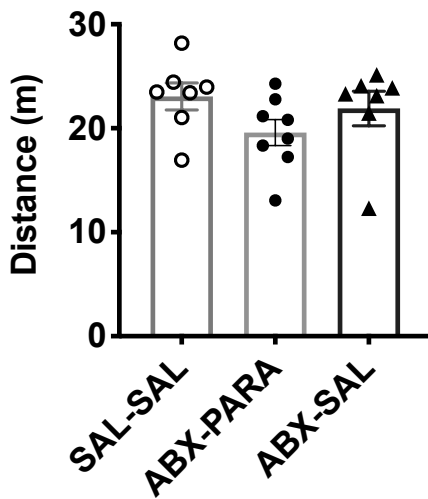

**H**

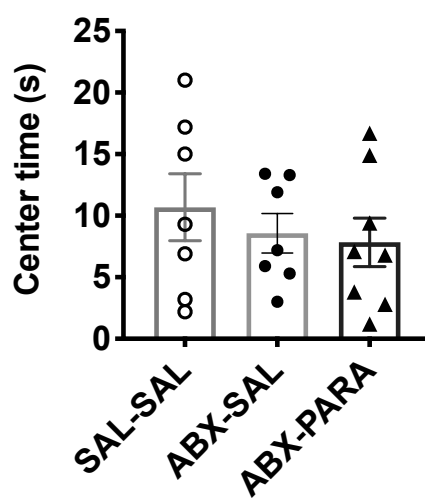

**Figure 5****A**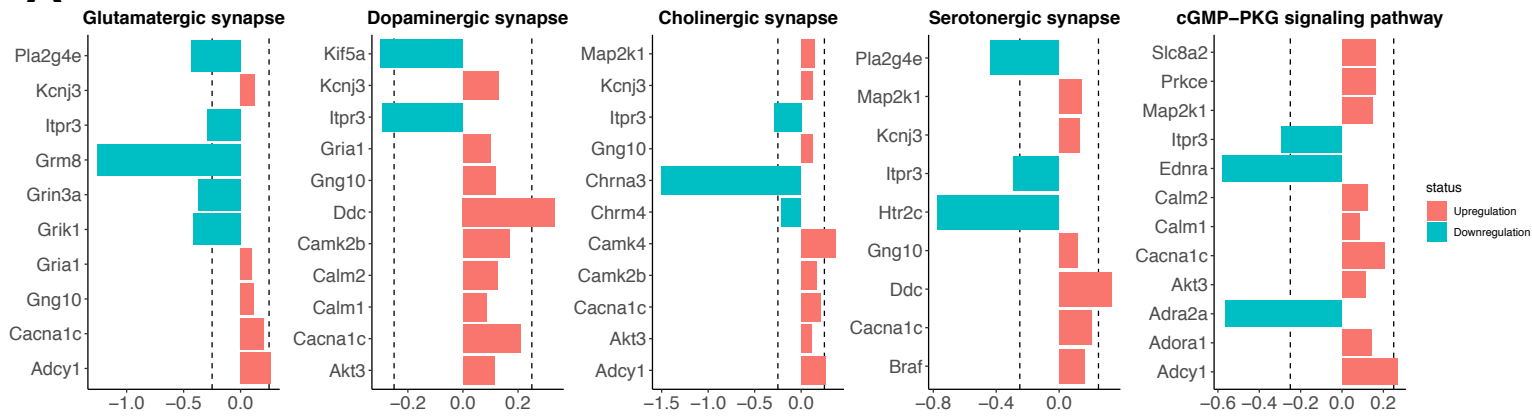**B**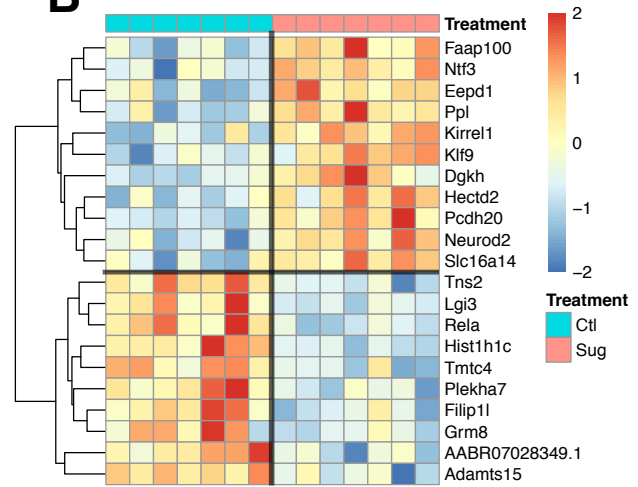**C**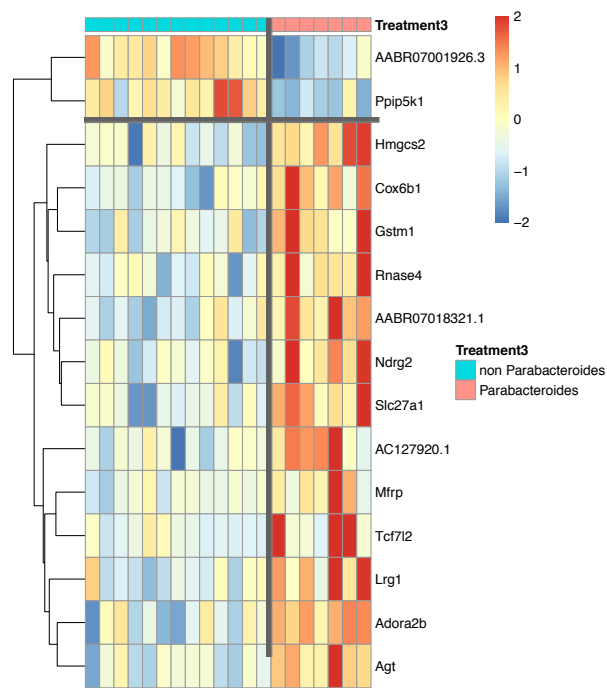**D**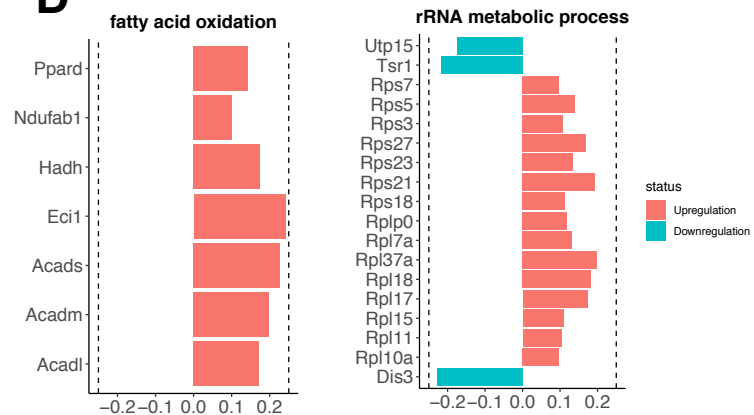**mitochondrial inner membrane****Valine, leucine and isoleucine degradation****Alzheimer disease****Parkinson disease**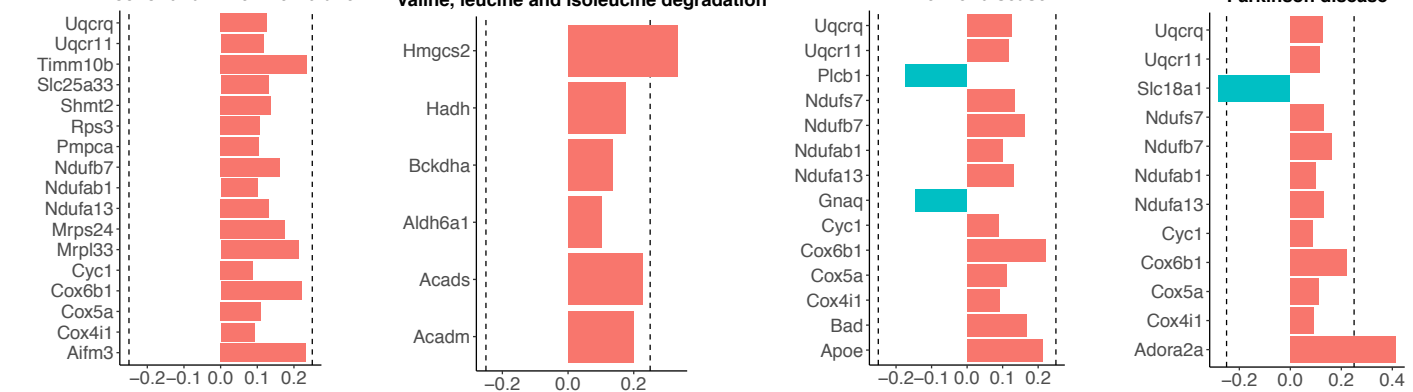

| Term                                                 | Overlap | P.value              | Adjusted.P.value    | Odds.Ratio  | Combined.Score |
|------------------------------------------------------|---------|----------------------|---------------------|-------------|----------------|
| cAMP signaling pathway                               | 18/211  | 9.08710002926925e-07 | 0.00027533913086885 | 3.922209511 | 54.56279715    |
| Long-term potentiation                               | 10/67   | 1.75113958513324e-06 | 0.00026529764714768 | 6.862240522 | 90.96067106    |
| Vascular smooth muscle contraction                   | 14/140  | 2.31824837751272e-06 | 0.00023414308612878 | 4.597701149 | 59.65378698    |
| Oxytocin signaling pathway                           | 14/154  | 7.11610557675168e-06 | 0.0005390499743893  | 4.179728318 | 49.54294651    |
| Circadian entrainment                                | 11/99   | 1.02664310479357e-05 | 0.00062214572150490 | 5.10855833  | 58.68010783    |
| Amphetamine addiction                                | 9/68    | 1.58699502114579e-05 | 0.00080143248567862 | 6.085192998 | 67.24797055    |
| Calcium signaling pathway                            | 15/189  | 1.74937542122293e-05 | 0.00075722964661506 | 3.648969166 | 39.96959184    |
| Cholinergic synapse                                  | 11/113  | 3.60773936379643e-05 | 0.00136643128403866 | 4.475632827 | 45.76508194    |
| Axon guidance                                        | 14/180  | 4.14870567165781e-05 | 0.00139673090945813 | 3.575989783 | 36.08219845    |
| Apelin signaling pathway                             | 12/138  | 4.9577399145753e-05  | 0.00150219519411632 | 3.998001    | 39.62808792    |
| Neurotrophin signaling pathway                       | 11/121  | 6.78430713999647e-05 | 0.00186876823947175 | 4.179728318 | 40.11834187    |
| Dopaminergic synapse                                 | 11/135  | 0.0001813359585736   | 0.00457873238039848 | 3.746275011 | 32.2747558     |
| Glutamatergic synapse                                | 10/114  | 0.00019405073221218  | 0.00452287475848392 | 4.033071184 | 34.47223604    |
| Aldosterone synthesis and secretion                  | 9/102   | 0.0003852671882922   | 0.00833828271803832 | 4.056795132 | 31.89279298    |
| IGMP-PKG signaling pathway                           | 12/172  | 0.00039732405330125  | 0.0082594587668537  | 3.207699476 | 25.11871164    |
| Inflammatory mediator regulation of TRP channels     | 10/127  | 0.00046458659984325  | 0.00879810873453165 | 3.620237126 | 27.78301233    |
| MAPK signaling pathway                               | 16/294  | 0.000759189930175945 | 0.0135314440496066  | 2.502150285 | 17.97359249    |
| GnRH signaling pathway                               | 8/90    | 0.000767481845084926 | 0.012919277255963   | 4.088645466 | 29.31247298    |
| Glioma                                               | 7/75    | 0.0012196493427778   | 0.0194501974137724  | 4.291187739 | 28.79040196    |
| Renin secretion                                      | 7/76    | 0.00131872717084366  | 0.0199787166382814  | 4.234724743 | 28.0803358     |
| Retrograde endocannabinoid signaling                 | 10/150  | 0.00167349865616307  | 0.0241461948960672  | 3.0651341   | 19.59490832    |
| Neuroactive ligand-receptor interaction              | 17/348  | 0.00171069778931894  | 0.0235609740983472  | 2.246003435 | 14.30895981    |
| Serotonergic synapse                                 | 9/132   | 0.00241588944480672  | 0.0318267174685407  | 3.134796238 | 18.88930332    |
| Fc gamma R-mediated phagocytosis                     | 7/87    | 0.00287625632706458  | 0.0363127361291903  | 3.699299775 | 21.64558595    |
| Regulation of actin cytoskeleton                     | 12/217  | 0.00294032709499641  | 0.0356367643913564  | 2.542507548 | 14.82087258    |
| Dilated cardiomyopathy (DCM)                         | 7/90    | 0.00347972133870684  | 0.0405521371395451  | 3.575989783 | 20.24297392    |
| Apoptosis                                            | 9/141   | 0.0037583644688354   | 0.0421772010127819  | 2.934702861 | 16.38670992    |
| Cocaine addiction                                    | 5/48    | 0.0037562901206963   | 0.040857699666325   | 4.789272031 | 26.7202504     |
| Morphine addiction                                   | 7/92    | 0.00393256649864465  | 0.0410885396237899  | 3.498250875 | 19.37493308    |
| Amyotrophic right ventricular cardiomyopathy (ARVC)  | 6/72    | 0.00476843186679707  | 0.0481611618546504  | 3.831417625 | 20.48175394    |
| Proteoglycans in cancer                              | 11/203  | 0.00502723467090038  | 0.0491371646865424  | 2.491365155 | 13.18650979    |
| Ras signaling pathway                                | 12/233  | 0.00518599384881057  | 0.0491048792559251  | 2.367914755 | 12.45479113    |
| response to calcium ion (GO:0051592)                 | 11/80   | 1.2352727119088e-06  | 0.00630359664887059 | 6.32183908  | 86.00368202    |
| axon guidance (GO:0007411)                           | 15/159  | 2.11788224048725e-06 | 0.00540377653660322 | 4.337453915 | 56.66924273    |
| nervous system development (GO:0007399)              | 25/456  | 2.46003232910435e-05 | 0.0418451499180649  | 2.52066949  | 26.75123758    |
| semaphorin-plexin signaling pathway (GO:0071526)     | 6/30    | 3.8991177233796e-05  | 0.0497429943560153  | 9.195402299 | 93.35333482    |
| regulation of cAMP biosynthetic process (GO:0030817) | 5/19    | 4.29910702140572e-05 | 0.0438766862604667  | 12.09921355 | 121.651762     |
| integral component of plasma membrane (GO:0005887)   | 61/1464 | 7.0402625056926e-07  | 0.00031399570775389 | 1.915708812 | 27.13879347    |
| dendrite (GO:0030425)                                | 16/216  | 2.18212117029006e-05 | 0.00486613020974683 | 3.405704555 | 36.55216023    |
| Hypothetical Network for Drug Addiction WP1246       | 6/31    | 4.74677094198248e-05 | 0.00835431685788917 | 8.898776418 | 88.59142051    |

| Term                                                                            | Overlap | P.value              | Adjusted.P.value     | Odds.Ratio  | Combined.Score |
|---------------------------------------------------------------------------------|---------|----------------------|----------------------|-------------|----------------|
| Ribosome                                                                        | 25/170  | 1.8140743921693e-10  | 5.49664540827297e-08 | 4.617231508 | 103.5657751    |
| Valine, leucine and isoleucine degradation                                      | 11/56   | 1.2691353275964e-06  | 0.000192274002094986 | 6.167302086 | 83.73453805    |
| Alzheimer disease                                                               | 19/175  | 3.33806655284938e-06 | 0.000337144721837223 | 3.408836062 | 42.98582769    |
| Huntington disease                                                              | 19/192  | 1.28962346143454e-05 | 0.000976889772036665 | 3.107012036 | 34.98052859    |
| Parkinson disease                                                               | 18/144  | 1.46258452357874e-05 | 0.000886326221267502 | 3.488574917 | 38.83732905    |
| Oxidative phosphorylation                                                       | 15/134  | 2.46175398478414e-05 | 0.00124318576231989  | 3.514609058 | 37.29721186    |
| Renal cell carcinoma                                                            | 10/88   | 5.50407863882209e-05 | 0.00238247975279583  | 4.817231508 | 45.26302087    |
| Hepatocellular carcinoma                                                        | 16/171  | 0.000118323973291775 | 0.00451939548842524  | 2.937747299 | 26.53863464    |
| Fatty acid degradation                                                          | 8/50    | 0.00016689013768195  | 0.00561863463529261  | 5.023547881 | 43.89589768    |
| Cardiac muscle contraction                                                      | 10/78   | 0.00017613868562032  | 0.00542790732529572  | 4.025278751 | 34.7274859     |
| Pathways in cancer                                                              | 33/535  | 0.00024656992139553  | 0.00679186056207689  | 1.936648132 | 16.08941113    |
| Non-alcoholic fatty liver disease (NAFLD)                                       | 14/151  | 0.00034292783199551  | 0.00865892775788684  | 2.910996288 | 23.22390084    |
| Propanoate metabolism                                                           | 6/31    | 0.00038022110318012  | 0.0088620748181358   | 6.076872436 | 47.85389755    |
| Thermogenesis                                                                   | 18/231  | 0.00045634785343122  | 0.00987667139926156  | 2.446533059 | 18.81935665    |
| Colorectal cancer                                                               | 10/88   | 0.00048364517887962  | 0.00976963261336839  | 3.567860711 | 27.23761603    |
| Lysine degradation                                                              | 8/59    | 0.00053628083889564  | 0.0101558183865863   | 4.25743967  | 32.06067671    |
| Chronic myeloid leukemia                                                        | 9/76    | 0.00067780917368503  | 0.0120809517427391   | 3.718086425 | 27.12955585    |
| Acute myeloid leukemia                                                          | 8/69    | 0.00153189364217227  | 0.0257835096432332   | 3.640252087 | 23.59388144    |
| Endometrial cancer                                                              | 7/58    | 0.00236407898597343  | 0.0377008385657867   | 3.789314134 | 22.91537237    |
| Glyoxylate and dicarboxylate metabolism                                         | 5/31    | 0.00275840767079955  | 0.0417898762126132   | 5.064003634 | 29.84302272    |
| Gastric cancer                                                                  | 12/150  | 0.00312702923091649  | 0.0451185646175094   | 2.51177394  | 14.48708786    |
| Retrograde endocannabinoid signaling                                            | 12/150  | 0.00312702923091649  | 0.043067720771259    | 2.51177394  | 14.48708786    |
| beta-Alanine metabolism                                                         | 5/32    | 0.0031848756288933   | 0.0419572763543221   | 4.905808477 | 28.20517071    |
| Prostate cancer                                                                 | 9/97    | 0.0037722652917845   | 0.0476874849308779   | 2.913139879 | 16.25172356    |
| cotranslational protein targeting to membrane (GO:0006163)                      | 23/94   | 1.49568324253231e-14 | 7.63247158664239e-11 | 7.682287318 | 244.5549244    |
| viral transcription (GO:0019033)                                                | 25/114  | 1.65246783633483e-14 | 4.21627168440631e-11 | 6.885345231 | 218.4990049    |
| protein targeting to ER (GO:0045047)                                            | 23/98   | 3.94454541709055e-14 | 6.70967175447103e-11 | 7.36872457  | 227.4272657    |
| SRP-dependent cotranslational protein targeting to membrane (GO:0006164)        | 22/90   | 5.73311848802441e-14 | 7.31402591109714e-11 | 7.674846818 | 234.0061039    |
| viral gene expression (GO:0019080)                                              | 24/111  | 7.7625902319601e-14  | 7.92249959097925e-11 | 6.788578217 | 204.9259636    |
| nuclear-transcribed mRNA catabolic process, nonsense-mediated decay (GO:000018) | 24/113  | 1.18161750327455e-13 | 1.00496586853501e-10 | 6.68642639  | 198.4971942    |
| nuclear-transcribed mRNA catabolic process (GO:000956)                          | 27/175  | 1.07890372161453e-11 | 7.86520813056919e-09 | 4.844134556 | 122.3264849    |
| ncRNA processing (GO:0034470)                                                   | 27/228  | 4.67386230344937e-09 | 2.98133991881279e-06 | 3.718086425 | 71.31765701    |
| mRNA metabolic process (GO:0016072)                                             | 25/201  | 6.38357070676274e-09 | 3.61948459073447e-06 | 3.905121176 | 73.6878333     |
| mRNA processing (GO:000634)                                                     | 25/203  | 7.82676247316835e-09 | 3.9939968036399e-06  | 3.866647076 | 72.17373963    |
| peptide biosynthetic process (GO:0043043)                                       | 23/175  | 8.94006953384337e-09 | 4.14737953010934e-06 | 4.126485759 | 76.47501535    |
| viral process (GO:0016032)                                                      | 28/221  | 1.05523973693884e-08 | 4.46235697707908e-06 | 6.893785506 | 67.91411105    |
| mitochondrial ATP synthesis coupled electron transport (GO:0042775)             | 18/86   | 1.13438822557321e-08 | 4.45291401392316e-06 | 5.841334745 | 108.884803     |
| ribosome biogenesis (GO:0042254)                                                | 26/227  | 1.81118251672489e-08 | 6.60176027346223e-06 | 3.596152117 | 64.10752778    |
| cellular protein metabolic process (GO:0044267)                                 | 40/485  | 4.37588247153129e-08 | 1.48867521681495e-05 | 2.58945767  | 43.87725333    |
| respiratory electron transport chain (GO:0022904)                               | 16/95   | 4.96518726560543e-08 | 1.58358441352403e-05 | 5.267945138 | 88.93387612    |
| translation (GO:0006412)                                                        | 25/233  | 1.23203616731831e-07 | 3.69828268342668e-05 | 3.368795521 | 53.59560786    |
| gene expression (GO:0010467)                                                    | 34/412  | 4.49194120183821e-07 | 0.00012734653307211  | 2.591028943 | 37.86998856    |
| cytoplasmic translation (GO:0002181)                                            | 11/55   | 1.0497349284598e-06  | 0.000281936702473896 | 6.279434851 | 86.44880925    |
| cellular macromolecule biosynthetic process (GO:0034645)                        | 28/368  | 2.0988332625941e-05  | 0.00535772462989088  | 2.388915432 | 25.7311694     |
| glutamate receptor signaling pathway (GO:0007215)                               | 7/37    | 0.00014404472041709  | 0.0350028670613536   | 5.94000594  | 52.54164983    |
| cytosolic ribosome (GO:0022626)                                                 | 22/125  | 6.4024267748916e-11  | 2.85548234151245e-08 | 5.525902669 | 129.7026553    |
| cytosolic part (GO:0044445)                                                     | 22/160  | 8.08431374352751e-09 | 1.80280196480664e-06 | 4.31711146  | 80.44220663    |
| polysomal ribosome (GO:0042788)                                                 | 9/29    | 1.80391663388915e-07 | 2.68182272901881e-05 | 9.743950631 | 151.3053851    |
| cytosolic large ribosomal subunit (GO:0022625)                                  | 13/70   | 2.74848283799486e-07 | 3.06455814136427e-05 | 5.83903079  | 88.08773562    |
| large ribosomal subunit (GO:0015934)                                            | 13/73   | 4.57645374088986e-07 | 4.08219673885572e-05 | 5.591277607 | 81.61683671    |
| ribosome (GO:0005840)                                                           | 13/77   | 8.67324705016003e-07 | 6.44711384061896e-05 | 5.300821627 | 73.98808595    |
| polysome (GO:0005844)                                                           | 11/64   | 5.03105411073812e-06 | 0.00032050019055473  | 5.396389325 | 65.8330776     |
| mitochondrial matrix (GO:0005759)                                               | 28/309  | 7.14751780482095e-06 | 0.00398474117618766  | 2.641833432 | 31.30241179    |
| cytosolic small ribosomal subunit (GO:0022627)                                  | 9/50    | 2.48344308134448e-05 | 0.00123068401586626  | 5.651491366 | 59.9243427     |
| small ribosomal subunit (GO:0015935)                                            | 9/54    | 4.70643775513193e-05 | 0.00209907123878884  | 5.232862376 | 52.14021014    |
| focal adhesion (GO:0005925)                                                     | 26/357  | 8.48584001310998e-05 | 0.0034406224053155   | 2.286628937 | 21.43603673    |
| mitochondrial inner membrane (GO:0005743)                                       | 24/342  | 0.00027325451243327  | 0.0101559593767699   | 2.203310474 | 18.07839801    |
| mitochondrion (GO:0005739)                                                      | 53/1027 | 0.00038186072014572  | 0.013100622860384    | 1.620302079 | 12.75253096    |
| mitochondrial respiratory chain complex I (GO:0005747)                          | 7/52    | 0.0012393864220466   | 0.0394827375159486   | 4.226542888 | 28.28888935    |
| RNA binding (GO:0003723)                                                        | 72/1388 | 2.85108813407164e-05 | 0.0328160244231646   | 1.628671883 | 17.04441708    |
| Cytoplasmic Ribosomal Proteins WP163                                            | 23/92   | 9.0267086051791e-15  | 1.56870090377115e-12 | 7.849293584 | 253.8350743    |
| Fatty Acid Beta Oxidation WP1269                                                | 8/34    | 8.8380976984804e-06  | 0.00077752597498626  | 7.387704133 | 85.9650117     |
| Mitochondrial LC-Fatty Acid Beta-Oxidation WP401                                | 5/16    | 0.00010523398308386  | 0.00617327200758661  | 9.811618954 | 89.86778136    |
| Electron Transport Chain WP295                                                  | 11/103  | 0.00044022390732466  | 0.0193785851922285   | 3.35309628  | 25.911978      |

1 **Supplemental Figures:**

Figure S1

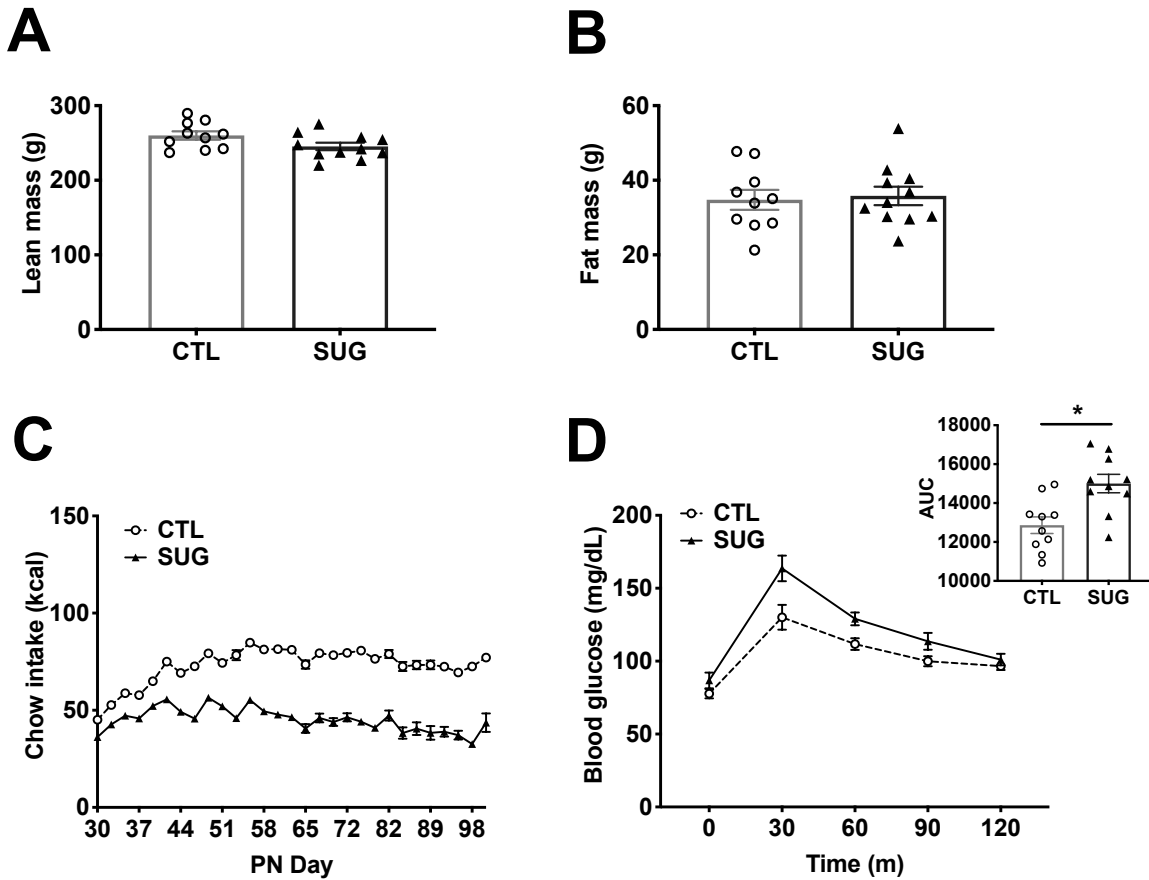

2

3

4 **Figure S1: Effect of early life sugar consumption on food intake and**

5 **metabolic measures** (A, B) There were no differences in lean mass or in fat mass

6 between animals fed sugar solutions or control animals (n=10,11; two-tailed, type 2

7 Student's T-test). (C) Kcal from chow intake were lower throughout the feeding period

8 in animals fed early life sugar (n=10,11). (D) Results from the intraperitoneal glucose

9 tolerance test show an elevated area under the curve (AUC) in rodents fed sugar

10 solutions during early life (n=10,11; two-tailed, type 2 Student's T-test;  $P < .05$ ).

11 CTL=control, SUG= sugar, PN= post-natal day; data shown as mean  $\pm$  SEM.

Figure S2

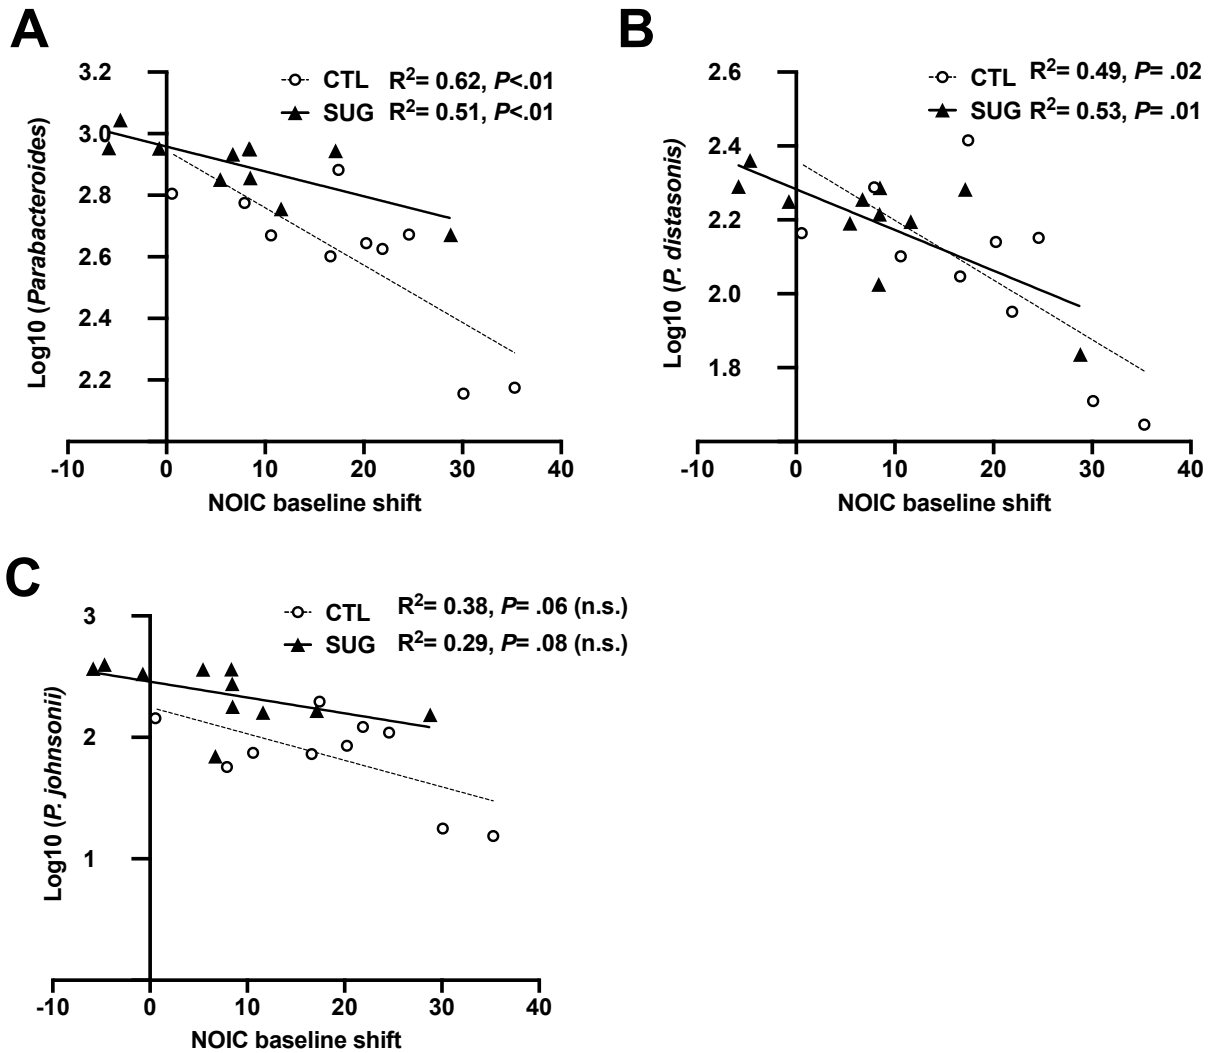

12

13

14 **Figure S2: Relationship between *Parabacteroides* and behavioral outcomes**

15 **in the Novel Object in Context task (NOIC) A) Linear regression of log normalized**

16 **fecal *Parabacteroides* counts against shift from baseline performance scores in the**

17 **NOIC task in sugar (SUG) and control (CTL) groups (n=10, 11). (B, C) Linear regression**

18 **of the most abundant fecal *Parabacteroides* species against shift from baseline**

19 **performance scores in NOIC across all groups tested (n=10, 11). \*P<0.05; data shown as**

20 **mean  $\pm$  SEM.**

Figure S3

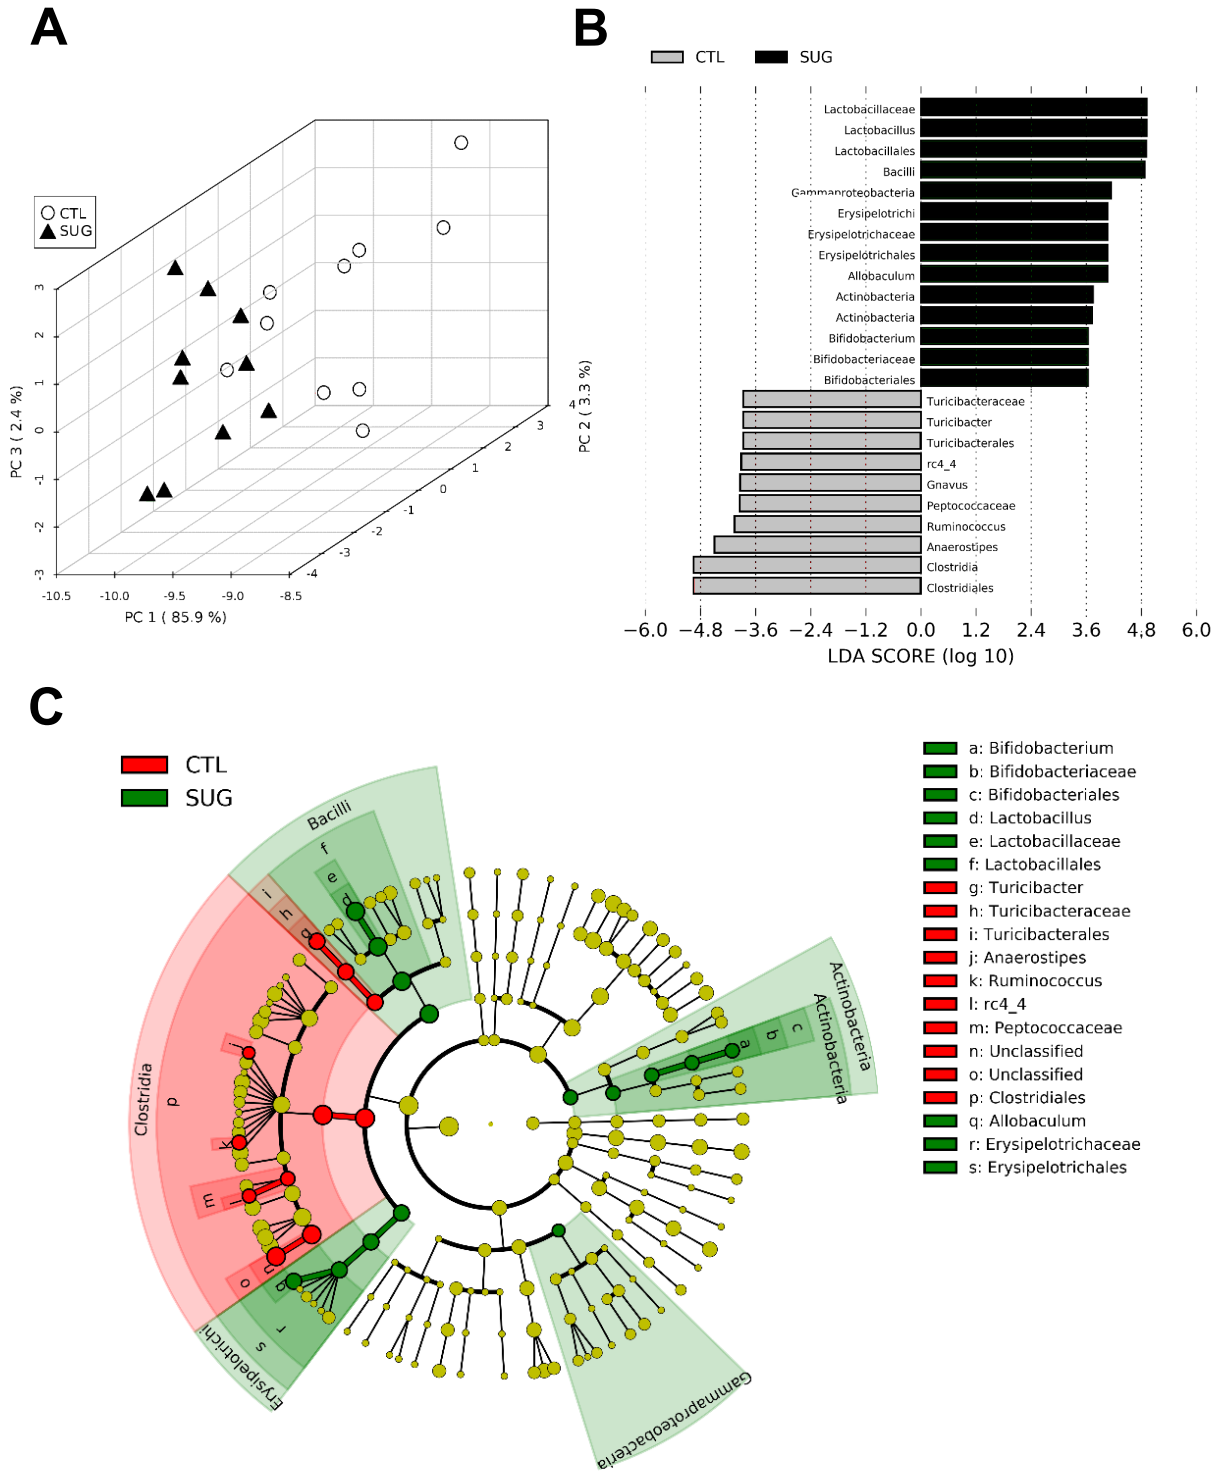

21

22



23 **Figure S3: Effect of early life sugar consumption on the rat cecal microbiota**

24 (A) Principal component analysis (PCA) was run using all phylogenic levels (112  
25 normalized taxa abundances) and shows different clustering patterns based on overall  
26 cecal microbial profiles. (B) Linear discriminant analysis (LDA) Effect Size (LEfSe), run  
27 using the GALAXY platform, identified characteristic features of the cecal microbiota of  
28 rats fed a control diet or early life sugar. Relative differences among groups were used to  
29 rank the features with the LDA score set at 2. (C) Identified taxa are displayed by scores  
30 and on a phylogenic cladogram. CTL=control, SUG= sugar.

Figure S4

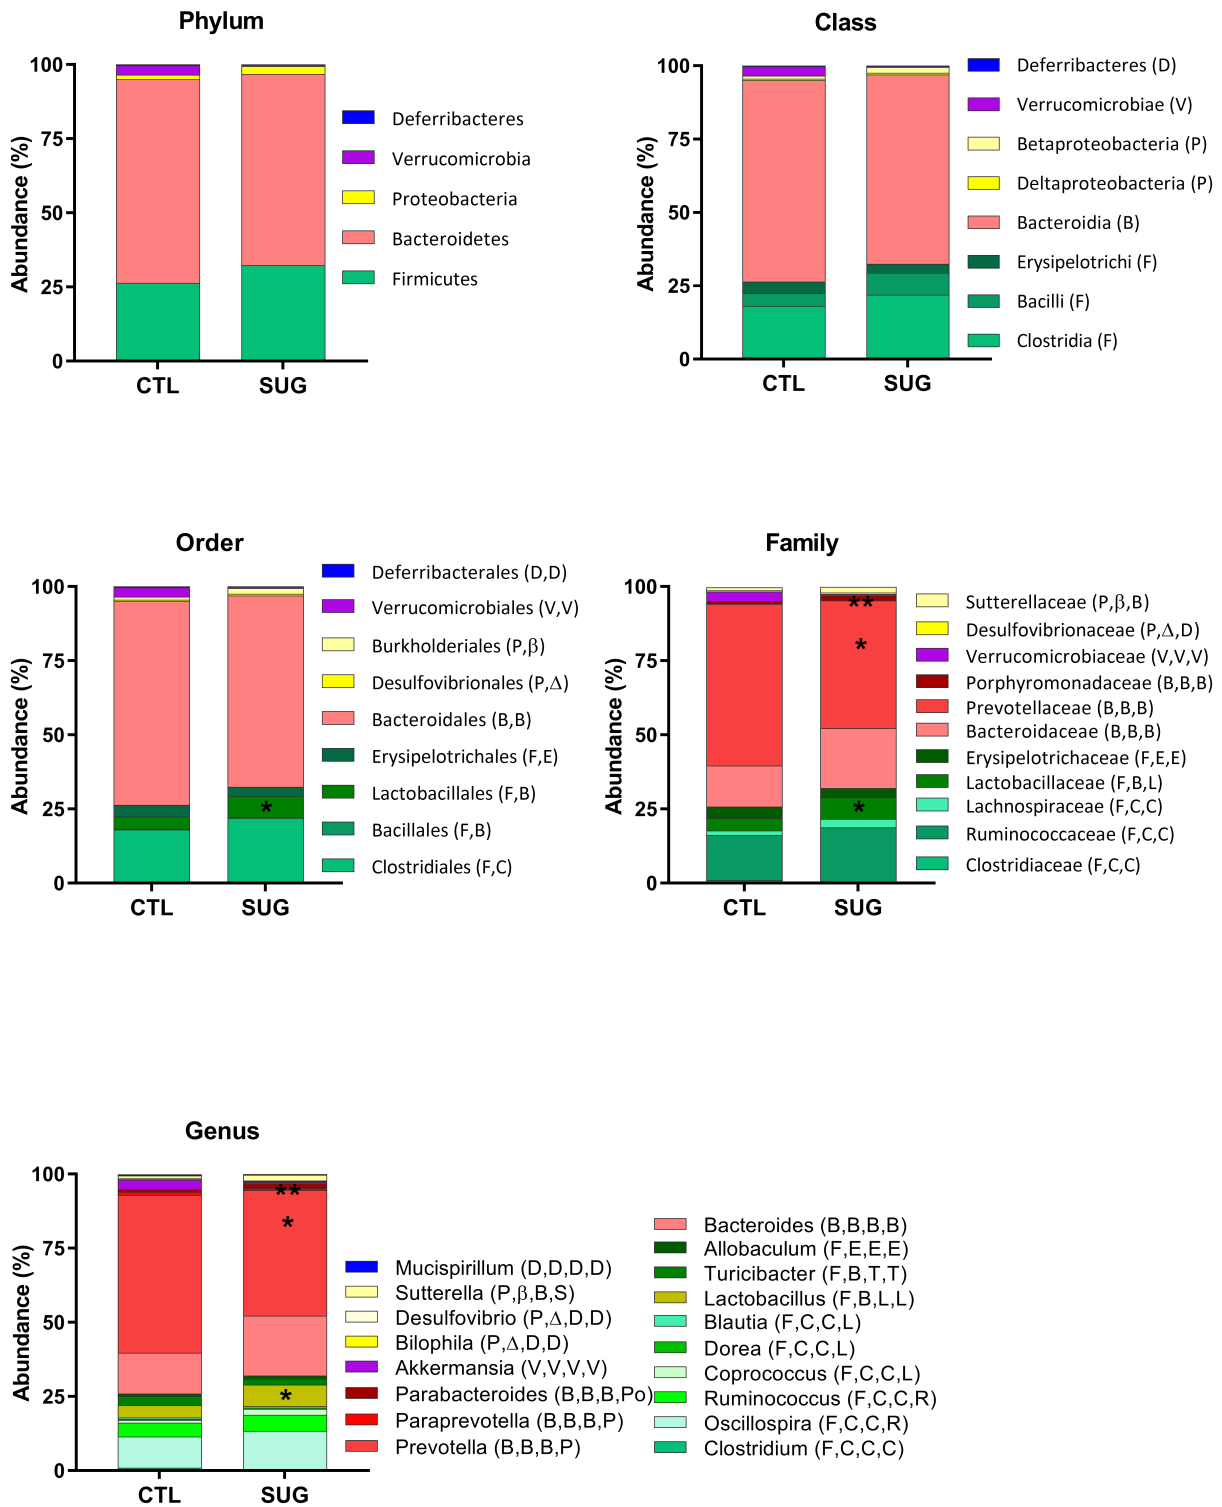

31

32

33 **Figure S4: Effect of early life sugar consumption on the rat fecal microbiota.**  
34 Filtered bacterial abundances by taxonomic levels phylum, class, order, family, genus in  
35 fecal samples from rats fed a control diets or early life sugar. Differences in abundances  
36 were assessed by Mann-Whitney non-parametric test. \*  $p < 0.05$ , \*\*\*  $p < 0.001$ .  
37 CTL=control, SUG= sugar.

Figure S5

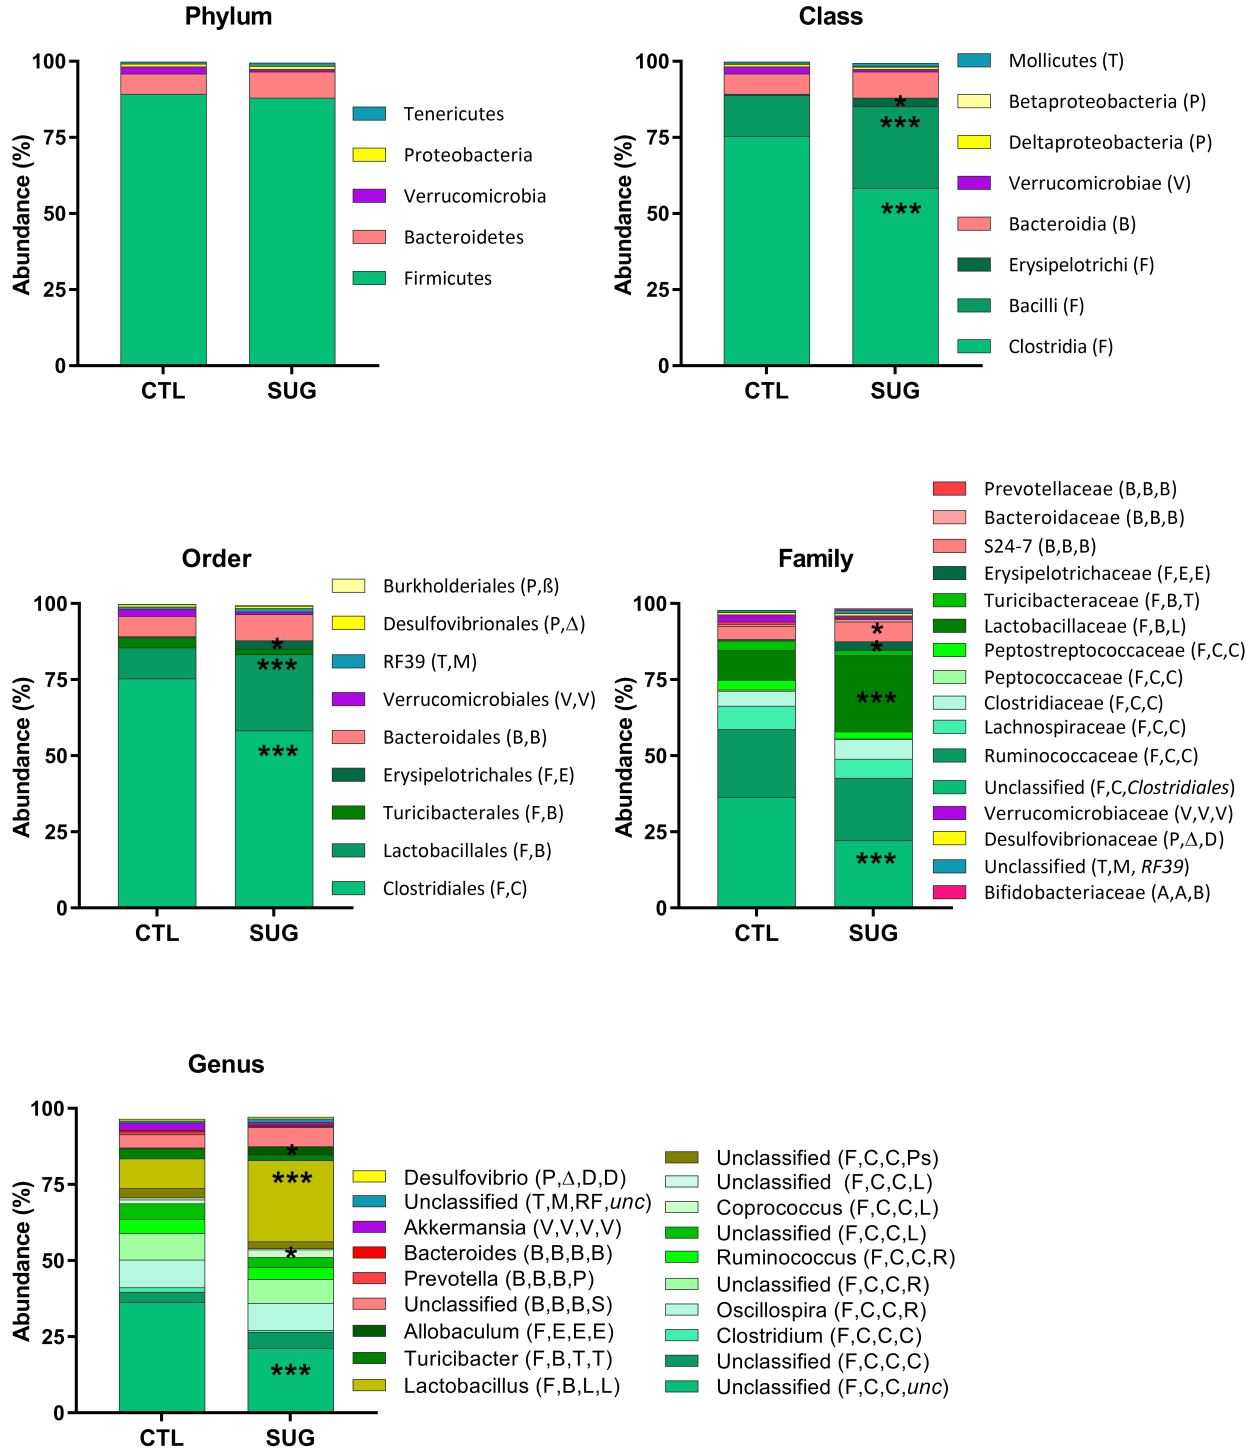

38

39

40 **Figure S5: Effect of early life sugar consumption on the rat cecal**  
 41 **microbiota:** Filtered bacterial abundances by taxonomic levels phylum, class, order,  
 42 family, genus in cecal samples from rats fed a control diets or early life sugar.  
 43 Differences in abundances were assessed by Mann-Whitney non-parametric test. \*  
 44  $p < 0.05$ , \*\*\*  $p < 0.001$ . CTL=control, SUG= sugar.

45  
 46  
 47 **Phylogenic taxonomy legend for Figure S4, S5:**  
 48

| Phylum                      | Class                           | Order                          | Family                             | Genus                                                |                                 |
|-----------------------------|---------------------------------|--------------------------------|------------------------------------|------------------------------------------------------|---------------------------------|
| F<br><i>Firmicutes</i>      | C<br><i>Clostridia</i>          | C<br><i>Clostridiales</i>      | C<br><i>Clostridiaceae</i>         | <i>Clostridium</i>                                   |                                 |
|                             |                                 |                                | L<br><i>Lachnospiraceae</i>        | <i>Coprococcus</i><br><i>Blautia</i><br><i>Dorea</i> |                                 |
|                             |                                 |                                | P<br><i>Peptococcaceae</i>         |                                                      |                                 |
|                             |                                 |                                | Ps<br><i>Peptostreptococcaceae</i> |                                                      |                                 |
|                             |                                 |                                | R<br><i>Ruminococcaceae</i>        | <i>Oscillospira</i><br><i>Ruminococcus</i>           |                                 |
|                             |                                 |                                | L<br><i>Lactobacillaceae</i>       | <i>Lactobacillus</i>                                 |                                 |
|                             | B<br><i>Bacilli</i>             | L<br><i>Lactobacillales</i>    | T<br><i>Turicibacterales</i>       | T<br><i>Turicibacteraceae</i>                        | <i>Turicibacter</i>             |
|                             |                                 |                                | B<br><i>Bacillales</i>             |                                                      |                                 |
|                             |                                 |                                | E<br><i>Erysipelotrichi</i>        | E<br><i>Erysipelotrichales</i>                       | E<br><i>Erysipelotrichaceae</i> |
|                             |                                 |                                |                                    |                                                      |                                 |
| B<br><i>Bacteroidetes</i>   | B<br><i>Bacteroidia</i>         | B<br><i>Bacteroidales</i>      | S<br><i>S24-7</i>                  |                                                      |                                 |
|                             |                                 |                                | B<br><i>Bacteroidaceae</i>         | <i>Bacteroides</i>                                   |                                 |
|                             |                                 |                                | P<br><i>Prevotellaceae</i>         | <i>Prevotella</i><br><i>Paraprevotella</i>           |                                 |
|                             |                                 |                                | Po<br><i>Porphyromonadaceae</i>    | <i>Parabacteroides</i>                               |                                 |
|                             |                                 |                                | V<br><i>Verrucomicrobiae</i>       | V<br><i>Verrucomicrobiales</i>                       | V<br><i>Verrucomicrobiaceae</i> |
| P<br><i>Proteobacteria</i>  | β<br><i>Betaproteobacteria</i>  | B<br><i>Burkholderiales</i>    | S<br><i>Sutterellaceae</i>         | <i>Sutterella</i>                                    |                                 |
|                             | Δ<br><i>Deltaproteobacteria</i> | D<br><i>Desulfovibrionales</i> | D<br><i>Desulfovibrionaceae</i>    | <i>Desulfovibrio</i><br><i>Bilophila</i>             |                                 |
| T<br><i>Tenericutes</i>     | M<br><i>Mollicutes</i>          | RF<br><i>RF39</i>              |                                    |                                                      |                                 |
| D<br><i>Deferribacteres</i> | D<br><i>Deferribacteres</i>     | D<br><i>Deferribacterales</i>  | D<br><i>Deferribacteraceae</i>     | <i>Mucispirillum</i>                                 |                                 |
| A<br><i>Actinobacteria</i>  | A<br><i>Actinobacteria</i>      | B<br><i>Bifidobacter</i>       | B<br><i>Bifidobacteriaceae</i>     |                                                      |                                 |

49  
 50  
 51

Figure S6

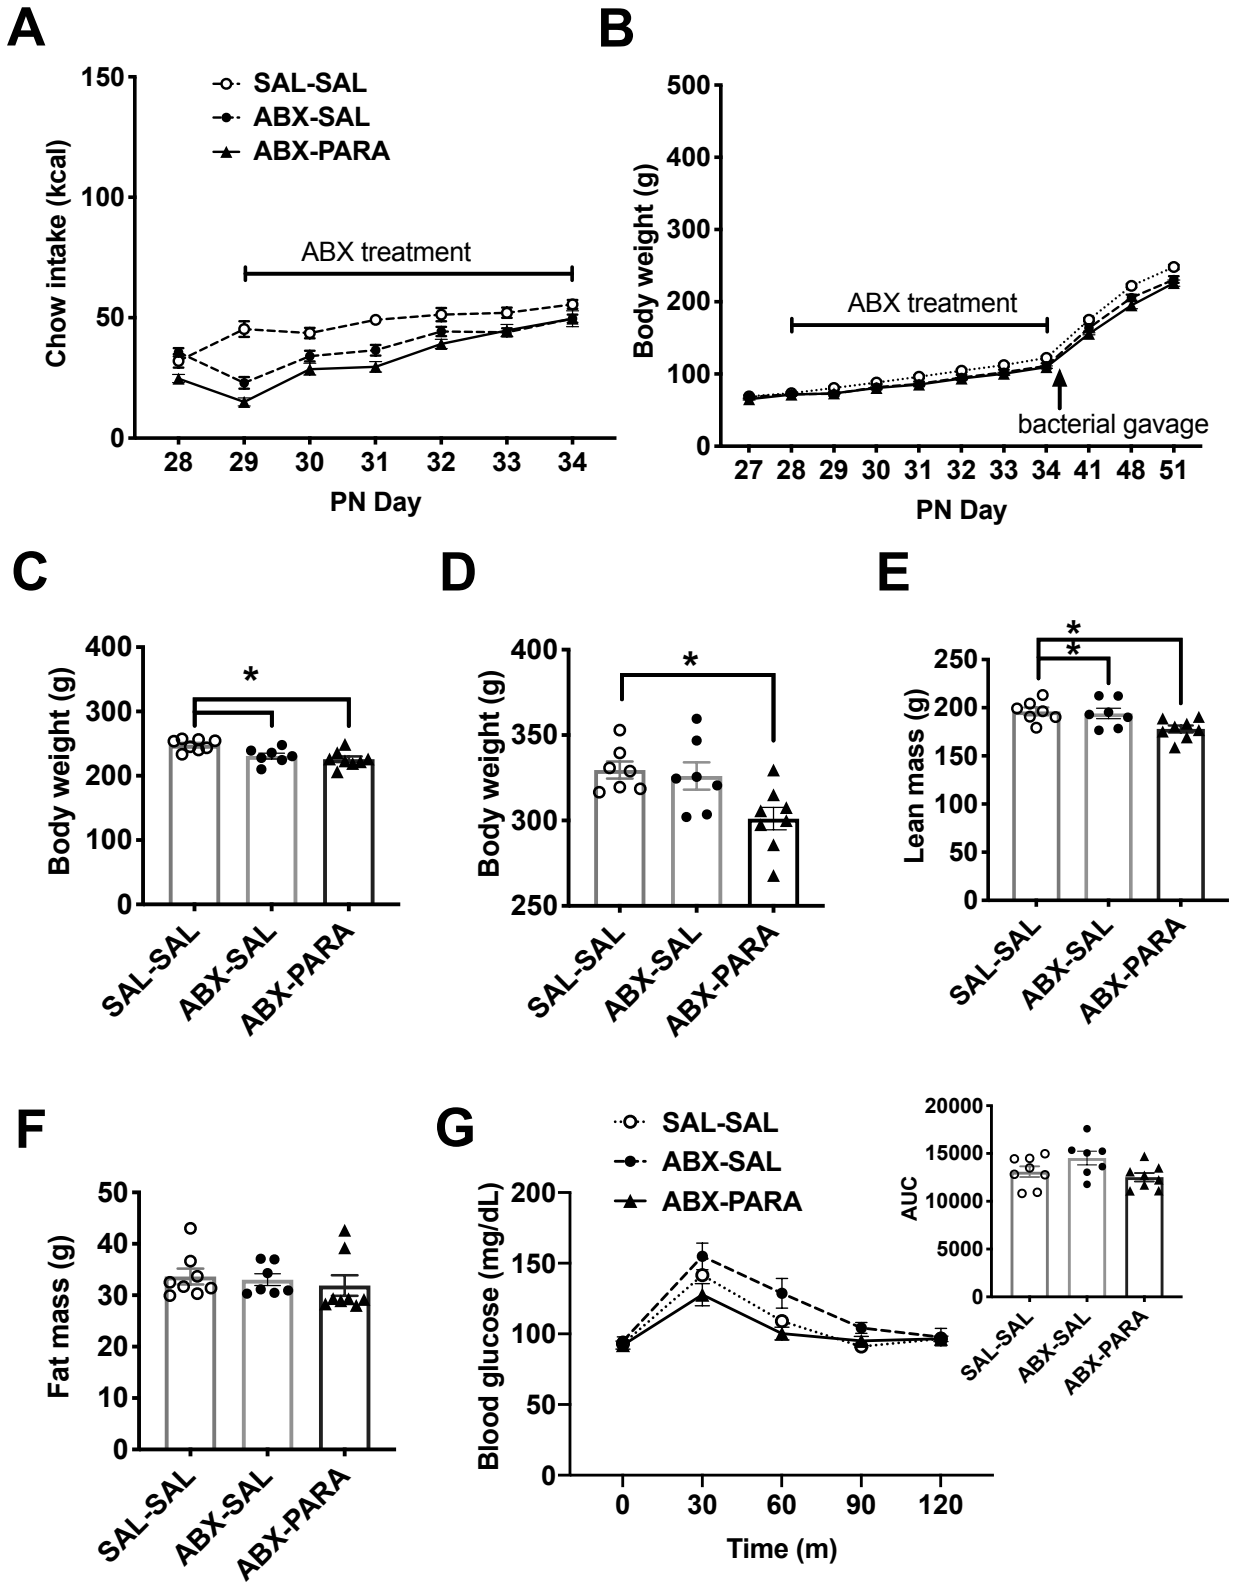

53 **Figure S6: Experimental design, food intake, and metabolic measures for**  
54 **gut *Parabacteroides* enrichment** (A) Effect of antibiotic treatment on food intake  
55 (B) and body weight (n=7,8). (C) Effect of gut *Parabacteroides* enrichment on body  
56 weight at PN 51 prior to the start of behavioral testing (n=7,8; one way ANOVA with  
57 Tukey's post hoc test,  $F_{(2,20)} = 8.79$ ; \* $P < .05$ ) (D) Effect of gut *Parabacteroides*  
58 enrichment on body weight (n=7,8; one way ANOVA with Tukey's post hoc test,  $F_{(2,19)} =$   
59  $5.7$ ; \* $P < .05$ ) (E) lean mass (n=7,8; one way ANOVA with Tukey's post hoc test,  $F_{(2,19)} =$   
60  $5.33$ ; \* $P < .05$ ) (F) and body fat (one way ANOVA, n.s.) at PN 76. (G) Blood glucose levels  
61 during an interaperitoneal glucose tolerance test (IP GTT) (n=7,8 one way ANOVA for  
62 AUC; n.s.) SAL-SAL=saline-saline control, ABX-SAL= antibiotics-saline control, ABX-  
63 PARA= antibiotics-*P. johnsonii* and *P. distasonis* enriched, PN= post-natal day; data  
64 shown as mean  $\pm$  SEM.

Figure S7

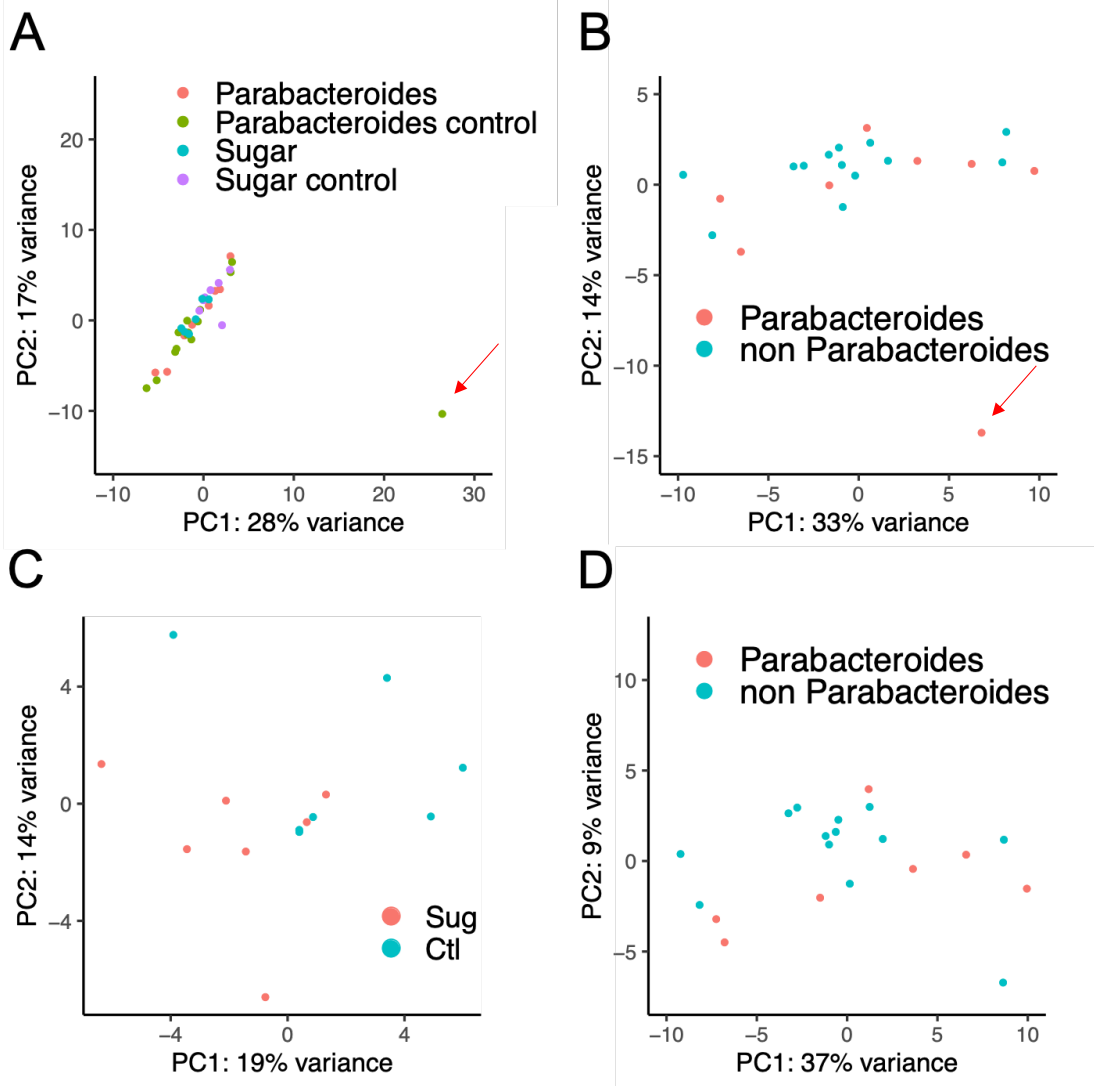

65

66

67 **Figure S7: Principal component analyses (PCA) of hippocampal gene**

68 **expression data to identify outliers** (A) PCA identified one control sample (red

69 arrow) as an outlier when all samples from both sugar and *Parabacteroides* enrichment

70 experiments were considered. (B) PCA identified one treatment sample (red arrow)

71 from the *Parabacteroides* experiment as an outlier. After removing the outliers, PCA

72 for the remaining samples from the sugar treatment experiment (C) and those from the

73 *Parabacteroides* enrichment experiments (D).



**Figure S8**

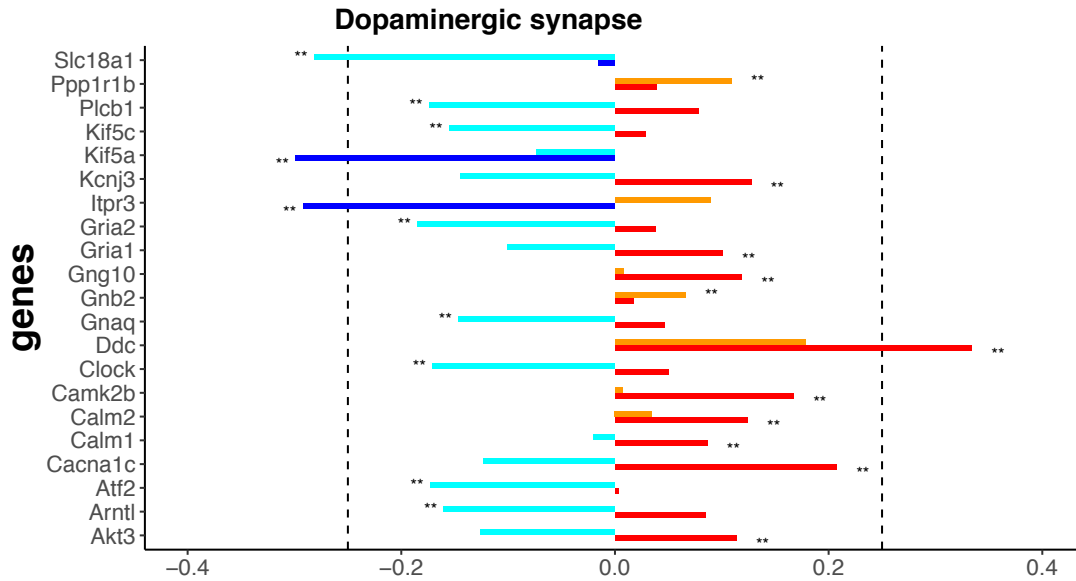

74

75

76 **Figure S8: Comparison of hippocampal gene expression pathways altered**

77 **by sugar and *Parabacteroides*.** The dopaminergic synapse pathway overlaps in the

78 sugar and *Parabacteroides* transfer experiments. Red= upregulated by sugar, dark

79 blue= downregulated by sugar, orange= upregulated by *Parabacteroides*, light blue=

80 downregulated by *Parabacteroides*. \*  $P < 0.05$  and \*\*  $P < 0.01$ . Dotted line indicated  $\pm$

81 0.25 log2 fold change.
